# Supplementary material for: In vitro and in vivo single-agent efficacy of checkpoint kinase inhibition in acute lymphoblastic leukemia
Source: Springer Nature journal article supplement (doi:10.1186/s13045-015-0206-5), 2015-11-05
Supplement: MOESM2 [file 9777566]

| Column # | Transcript ID | Gene Symbol | RefSeq       | p-value(Treatment) | Mean(DMSO) | LSMean(DMSO) | p-value(PF-0047736 vs. DMSO) | Ratio(PF-0047736 vs. DMSO) | Fold-Change(PF-0047736 vs. DMSO) | Fold-Change(PF-0047736 vs. DMSO) (Description) |
|----------|---------------|-------------|--------------|--------------------|------------|--------------|------------------------------|----------------------------|----------------------------------|------------------------------------------------|
| 20364    | 8058914       | AAMP        | NM_001087    | 0.00230378         | 8.37162    | 8.37162      | 0.00230378                   | 0.823485                   | -1.213485                        | PF-0047736 down vs DMSO                        |
| 14759    | 8002347       | AARS        | NM_001605    | 0.0466349          | 9.86692    | 9.86692      | 0.0466349                    | 1.40831                    | 1.40831                          | PF-0047736 up vs DMSO                          |
| 117723   | 79726395      | AC4         | NM_013695    | 0.031233           | 8.1233     | 8.1233       | 0.031233                     | 0.560828                   | -1.560828                        | PF-0047736 down vs DMSO                        |
| 24215    | 8097647       | ABCE1       | NM_002940    | 0.0237173          | 9.70655    | 9.70655      | 0.0237173                    | 0.704324                   | -1.4198                          | PF-0047736 down vs DMSO                        |
| 15920    | 8014487       | ACACA       | NM_198839    | 0.00465182         | 8.78227    | 8.78227      | 0.00465182                   | 0.656759                   | -1.656759                        | PF-0047736 down vs DMSO                        |
| 23478    | 8090511       | ACAD9       | NR_033426    | 0.0334495          | 4.86311    | 4.86311      | 0.0334495                    | 1.2094                     | 1.2094                           | PF-0047736 up vs DMSO                          |
| 26917    | 8123137       | ACAT2       | NM_005891    | 0.0155366          | 9.23601    | 9.23601      | 0.0155366                    | 0.677593                   | -1.47581                         | PF-0047736 down vs DMSO                        |
| 14723    | 8002057       | ACD         | NM_001082486 | 0.0327476          | 7.71141    | 7.71141      | 0.0327476                    | 0.80328                    | -1.2449                          | PF-0047736 down vs DMSO                        |
| 16019    | 8015460       | ACLY        | NM_001096    | 0.0175606          | 10.5622    | 10.5622      | 0.0175606                    | 0.764924                   | -1.30732                         | PF-0047736 down vs DMSO                        |
| 24472    | 8099965       | ACOT7       | NM_007274    | 0.0178785          | 8.49802    | 8.49802      | 0.0178785                    | 0.661511                   | -1.11499                         | PF-0047736 down vs DMSO                        |
| 5732     | 7912013       | ACOT7       | NM_007274    | 0.0379129          | 8.17551    | 8.17551      | 0.0379129                    | 0.851131                   | -1.17951                         | PF-0047736 down vs DMSO                        |
| 19422    | 8048733       | ACSL3       | NM_004451    | 0.00194206         | 9.23703    | 9.23703      | 0.00194206                   | 0.785791                   | -1.2726                          | PF-0047736 down vs DMSO                        |
| 13933    | 7993726       | ACSM5       | NM_017888    | 0.0195938          | 4.65477    | 4.65477      | 0.0195938                    | 0.925836                   | -1.0801                          | PF-0047736 down vs DMSO                        |
| 7987     | 7934906       | ACTA2       | NM_001141945 | 0.0414549          | 5.75747    | 5.75747      | 0.0414549                    | 1.89891                    | 1.89891                          | PF-0047736 up vs DMSO                          |
| 13360    | 7987315       | ACTC1       | NM_005159    | 0.0464735          | 4.78004    | 4.78004      | 0.0464735                    | 0.861385                   | -1.16092                         | PF-0047736 down vs DMSO                        |
| 6683     | 7921821       | ADAMT54     | NM_005099    | 0.0263687          | 4.82976    | 4.82976      | 0.0263687                    | 0.876789                   | -1.14053                         | PF-0047736 down vs DMSO                        |
| 21122    | 8073242       | ADSL        | NM_000026    | 0.0391221          | 9.41942    | 9.41942      | 0.0391221                    | 0.778343                   | -1.28478                         | PF-0047736 down vs DMSO                        |
| 19825    | 8144378       | AGPAT5      | NM_018361    | 0.000635376        | 8.95975    | 8.95975      | 0.000635376                  | 0.713056                   | -1.40241                         | PF-0047736 down vs DMSO                        |
| 11682    | 8086664       | AGPAT5      | NM_018361    | 0.0316319          | 9.22481    | 9.22481      | 0.0316319                    | 0.745739                   | -1.34124                         | PF-0047736 down vs DMSO                        |
| 17961    | 8035023       | AKAP11      | NM_014371    | 0.0184159          | 8.89065    | 8.89065      | 0.0184159                    | 1.24189                    | 1.24189                          | PF-0047736 up vs DMSO                          |
| 27486    | 8128788       | AKO1        | NM_001145128 | 0.0484291          | 4.19406    | 4.19406      | 0.0484291                    | 1.51639                    | 1.51639                          | PF-0047736 up vs DMSO                          |
| 8021     | 7932300       | ALDH18A1    | NM_002860    | 0.0210157          | 9.04198    | 9.04198      | 0.0210157                    | 0.713658                   | -1.40123                         | PF-0047736 down vs DMSO                        |
| 14018    | 7994737       | ALDOA       | NM_000034    | 0.00224825         | 9.66786    | 9.66786      | 0.00224825                   | 0.749457                   | -1.3343                          | PF-0047736 down vs DMSO                        |
| 8151     | 7936923       | ALDOA2      | M21191       | 0.0104962          | 5.97013    | 5.97013      | 0.0104962                    | 0.870565                   | -1.28112                         | PF-0047736 down vs DMSO                        |
| 15838    | 8013660       | ALDOC       | NM_005165    | 0.0281531          | 8.41021    | 8.41021      | 0.0281531                    | 0.457838                   | -2.48188                         | PF-0047736 down vs DMSO                        |
| 15031    | 8005399       | ALKRH5      | NM_017758    | 0.0299715          | 9.27321    | 9.27321      | 0.0299715                    | 0.864384                   | -1.15689                         | PF-0047736 down vs DMSO                        |
| 11249    | 7967149       | ANAPCS      | NM_016237    | 0.0139596          | 9.59904    | 9.59904      | 0.0139596                    | 0.707064                   | -1.29741                         | PF-0047736 down vs DMSO                        |
| 12899    | 7982511       | ANP32A      | NM_006305    | 0.0135808          | 11.25337   | 11.25337     | 0.0135808                    | 0.835866                   | -1.19636                         | PF-0047736 down vs DMSO                        |
| 13565    | 7990020       | ANP32B      | NM_006305    | 0.0156837          | 10.131     | 10.131       | 0.0156837                    | 0.725699                   | -1.29438                         | PF-0047736 down vs DMSO                        |
| 30518    | 8156750       | ANP32B      | NM_006401    | 0.0117012          | 10.7219    | 10.7219      | 0.0117012                    | 0.736292                   | -1.35816                         | PF-0047736 down vs DMSO                        |
| 17515    | 8030470       | AP2A1       | NM_014203    | 0.0376961          | 8.62376    | 8.62376      | 0.0376961                    | 0.802267                   | -1.24647                         | PF-0047736 down vs DMSO                        |
| 15170    | 8006542       | AP2B1       | NM_001030006 | 0.0339995          | 10.2089    | 10.2089      | 0.0339995                    | 0.878742                   | -1.13799                         | PF-0047736 down vs DMSO                        |
| 17762    | 8032670       | APBA3       | NM_004486    | 0.0465276          | 6.27366    | 6.27366      | 0.0465276                    | 1.1715                     | 1.1715                           | PF-0047736 up vs DMSO                          |
| 8429     | 7939424       | APIS        | NM_001142930 | 0.0273292          | 10.3879    | 10.3879      | 0.0273292                    | 0.779255                   | -1.28828                         | PF-0047736 down vs DMSO                        |
| 18745    | 8042402       | APLF        | NM_173545    | 0.0495547          | 7.00444    | 7.00444      | 0.0495547                    | 1.51442                    | 1.51442                          | PF-0047736 up vs DMSO                          |
| 10454    | 7931814       | AP2A2       | NM_030632    | 0.0257415          | 5.73669    | 5.73669      | 0.0257415                    | 0.902665                   | -1.24074                         | PF-0047736 down vs DMSO                        |
| 16431    | 8019765       | ARHGAP10    | NM_001185077 | 0.0487076          | 10.3041    | 10.3041      | 0.0487076                    | 0.785176                   | -1.2736                          | PF-0047736 down vs DMSO                        |
| 28148    | 8135229       | ARMC10      | NM_031905    | 0.0186609          | 8.22978    | 8.22978      | 0.0186609                    | 0.748872                   | -1.33534                         | PF-0047736 down vs DMSO                        |
| 23341    | 8089034       | ARMC10      | NM_031905    | 0.0283346          | 8.16419    | 8.16419      | 0.0283346                    | 0.654152                   | -1.5287                          | PF-0047736 down vs DMSO                        |
| 28090    | 8134581       | ARPC1A      | NM_006409    | 0.0370789          | 9.40309    | 9.40309      | 0.0370789                    | 0.870753                   | -1.14843                         | PF-0047736 down vs DMSO                        |
| 6791     | 7922793       | ARPC5       | NM_005717    | 0.02246            | 9.92443    | 9.92443      | 0.02246                      | 0.923761                   | -1.08253                         | PF-0047736 down vs DMSO                        |
| 25845    | 8113073       | ARRDC3      | NM_020801    | 0.00155508         | 8.31082    | 8.31082      | 0.00155508                   | 2.17704                    | 2.17704                          | PF-0047736 up vs DMSO                          |
| 15672    | 8012028       | ASGR2       | NM_080912    | 0.0488542          | 5.5018     | 5.5018       | 0.0488542                    | 1.13382                    | 1.13382                          | PF-0047736 up vs DMSO                          |
| 116548   | 8020844       | ATAD2       | NM_030263    | 0.0246263          | 3.94243    | 3.94243      | 0.0246263                    | 1.24491                    | 1.24491                          | PF-0047736 up vs DMSO                          |
| 4239     | 7896952       | ATAD3       | NM_018188    | 0.0327664          | 8.76908    | 8.76908      | 0.0327664                    | 0.809874                   | -1.23476                         | PF-0047736 down vs DMSO                        |
| 4238     | 7896937       | ATAD3C      | NM_001039211 | 0.0118469          | 6.69343    | 6.69343      | 0.0118469                    | 0.810968                   | -1.23309                         | PF-0047736 down vs DMSO                        |
| 5479     | 7909610       | ATF3        | NM_001040619 | 0.000835378        | 5.49884    | 5.49884      | 0.000835378                  | 2.76388                    | 2.76388                          | PF-0047736 up vs DMSO                          |
| 23390    | 8089527       | ATG3        | NM_022488    | 0.022949           | 9.73973    | 9.73973      | 0.022949                     | 0.839209                   | -1.1916                          | PF-0047736 down vs DMSO                        |
| 19368    | 8048120       | ATC         | NM_004044    | 0.0487314          | 10.1829    | 10.1829      | 0.0487314                    | 0.75121                    | -1.33119                         | PF-0047736 down vs DMSO                        |
| 23721    | 8092849       | ATP13A3     | NM_024524    | 0.039614           | 9.7351     | 9.7351       | 0.039614                     | 0.822868                   | -1.21526                         | PF-0047736 down vs DMSO                        |
| 7149     | 7904254       | ATP1A1      | NM_000701    | 0.0225777          | 10.708     | 10.708       | 0.0225777                    | 0.69714                    | -1.48443                         | PF-0047736 down vs DMSO                        |
| 10454    | 7958644       | ATP2B2      | NM_170665    | 0.0363922          | 10.6874    | 10.6874      | 0.0363922                    | 0.80119                    | -1.24704                         | PF-0047736 down vs DMSO                        |
| 7123     | 7926084       | ATP5C1      | NM_001001973 | 0.0226502          | 10.8369    | 10.8369      | 0.0226502                    | 0.893058                   | -1.11975                         | PF-0047736 down vs DMSO                        |
| 15339    | 8008132       | ATP5G1      | NM_005175    | 0.00903721         | 12.0487    | 12.0487      | 0.00903721                   | 0.764457                   | -1.30812                         | PF-0047736 down vs DMSO                        |
| 10545    | 7959657       | ATP6V0A2    | NM_012463    | 0.0469813          | 8.89506    | 8.89506      | 0.0469813                    | 0.844782                   | -1.18374                         | PF-0047736 down vs DMSO                        |
| 28222    | 8136039       | ATP6V1F     | NM_004231    | 0.0188719          | 9.79298    | 9.79298      | 0.0188719                    | 0.749276                   | -1.3462                          | PF-0047736 down vs DMSO                        |
| 22530    | 8080878       | ATXN7       | NM_000333    | 0.032048           | 9.68539    | 9.68539      | 0.032048                     | 1.26194                    | 1.26194                          | PF-0047736 up vs DMSO                          |
| 10994    | 7964555       | AVIL        | NM_006576    | 0.0223365          | 5.21788    | 5.21788      | 0.0223365                    | 1.25356                    | 1.25356                          | PF-0047736 up vs DMSO                          |
| 18181    | 8037032       | B3GNT8      | NM_198540    | 0.0311319          | 5.72463    | 5.72463      | 0.0311319                    | 1.13781                    | 1.13781                          | PF-0047736 up vs DMSO                          |
| 4621     | 7900931       | BAGALT2     | NM_003780    | 0.0043671          | 8.7788     | 8.7788       | 0.0043671                    | 0.692561                   | -1.44433                         | PF-0047736 down vs DMSO                        |
| 18178    | 8037010       | BAGIN1      | NM_030568    | 0.039568           | 6.541      | 6.541        | 0.039568                     | 1.20091                    | 1.20091                          | PF-0047736 up vs DMSO                          |
| 18273    | 8037872       | BBC3        | NM_001112740 | 0.0326482          | 6.72157    | 6.72157      | 0.0326482                    | 1.19971                    | 1.19971                          | PF-0047736 up vs DMSO                          |
| 7618     | 7931268       | BCCIP       | NM_016567    | 0.0487701          | 8.7524     | 8.7524       | 0.0487701                    | 0.793446                   | -1.26033                         | PF-0047736 down vs DMSO                        |
| 13472    | 7988852       | BCL2L10     | NM_020396    | 0.0112458          | 4.78959    | 4.78959      | 0.0112458                    | 1.18507                    | 1.18507                          | PF-0047736 up vs DMSO                          |
| 12212    | 7976567       | BDKRB1      | NM_000710    | 0.0473434          | 4.46539    | 4.46539      | 0.0473434                    | 0.885516                   | -1.12928                         | PF-0047736 down vs DMSO                        |
| 8588     | 7940582       | BEST1       | NM_004183    | 0.00341003         | 5.04941    | 5.04941      | 0.00341003                   | 2.3629                     | 2.3629                           | PF-0047736 up vs DMSO                          |
| 17076    | 8026095       | BEST2       | NM_017482    | 0.0431396          | 4.68513    | 4.68513      | 0.0431396                    | 1.15133                    | -1.15133                         | PF-0047736 down vs DMSO                        |
| 22743    | 8002774       | BHLHE40     | NM_003571    | 0.0454287          | 4.84714    | 4.84714      | 0.0454287                    | 1.19087                    | 1.19087                          | PF-0047736 up vs DMSO                          |
| 116548   | 8127193       | BMPS5       | NM_020069    | 0.0302669          | 3.30625    | 3.30625      | 0.0302669                    | 0.906251                   | -1.29753                         | PF-0047736 down vs DMSO                        |
| 8168     | 7937079       | BNIPI3      | NM_004052    | 0.0356865          | 9.75025    | 9.75025      | 0.0356865                    | 0.43987                    | -2.2734                          | PF-0047736 down vs DMSO                        |
| 22646    | 8081686       | BOC         | NM_033254    | 0.0231607          | 4.44767    | 4.44767      | 0.0231607                    | 1.13229                    | 1.13229                          | PF-0047736 up vs DMSO                          |
| 10552    | 7959777       | BRISBP      | NM_080626    | 0.0379022          | 10.2561    | 10.2561      | 0.0379022                    | 0.70661                    | -1.41521                         | PF-0047736 down vs DMSO                        |
| 16884    | 8023955       | BSG         | NM_001728    | 0.0434207          | 10.1527    | 10.1527      | 0.0434207                    | 0.875232                   | -1.14255                         | PF-0047736 down vs DMSO                        |
| 24594    | 8101002       | BTC         | NM_001729    | 0.0207555          | 4.0909     | 4.0909       | 0.0207555                    | 1.13601                    | 1.13601                          | PF-0047736 up vs DMSO                          |
| 11088    | 7965423       | BTG1        | NM_001731    | 0.000915303        | 9.29435    | 9.29435      | 0.000915303                  | 1.91036                    | 1.91036                          | PF-0047736 up vs DMSO                          |
| 5420     | 7909817       | BTG2        | NM_006763    | 0.0473404          | 7.73753    | 7.73753      | 0.0473404                    | 2.0536                     | 2.0536                           | PF-0047736 up vs DMSO                          |
| 26332    | 8117485       | BTBD21      | NM_020967    | 0.0359617          | 6.95074    | 6.95074      | 0.0359617                    | 1.3262                     | 1.3262                           | PF-0047736 up vs DMSO                          |
| 8130     | 7936706       | CBORF19     | NM_024834    | 0.0245511          | 9.90151    | 9.90151      | 0.0245511                    | 0.728016                   | -1.3736                          | PF-0047736 down vs DMSO                        |
| 8159     | 7936996       | CBORF90     | NM_001004298 | 0.0275295          | 4.08732    | 4.08732      | 0.0275295                    | 0.860531                   | -1.16207                         | PF-0047736 down vs DMSO                        |
| 8839     | 7943162       | C11orf54    | NM_014039    | 0.0315265          | 8.24193    | 8.24193      | 0.0315265                    | 1.30513                    | 1.30513                          | PF-0047736 up vs DMSO                          |
| 9514     | 7949327       | C11orf85    | BC106951     | 0.00939632         | 4.05475    | 4.05475      | 0.00939632                   | 1.14611                    | 1.14611                          | PF-0047736 up vs DMSO                          |
| 9764     | 7951593       | C11orf92    | NR_034154    | 0.0460335          | 4.68546    | 4.68546      | 0.0460335                    | 1.13731                    | 1.13731                          | PF-0047736 up vs DMSO                          |
| 9931     | 7953211       | C12orf5     | NM_020375    | 0.039502           | 6.39555    | 6.39555      | 0.039502                     | 1.57274                    | 1.57274                          | PF-0047736 up vs DMSO                          |
| 10338    | 7957351       | C12orf64    | NM_173591    | 0.0428505          | 2.83803    | 2.83803      | 0.0428505                    | 1.13774                    | 1.13774                          | PF-0047736 up vs DMSO                          |
| 11825    | 7972805       | C12orf79    | NM_027701    | 0.0458503          | 3.65612    | 3.65612      | 0.04                         |                            |                                  |                                                |

|        |                    |              |             |         |         |             |          |                         |                         |
|--------|--------------------|--------------|-------------|---------|---------|-------------|----------|-------------------------|-------------------------|
| 27005  | 8124008 CCD90A     | NM_001031713 | 0.0445061   | 8.59    | 8.59    | 0.0445061   | 0.790193 | -1.26551                | PF-0047736 down vs DMSO |
| 15179  | 8006608 CCL4L1     | NM_001001435 | 0.00201532  | 4.10213 | 4.10213 | 0.00201532  | 1.22592  | 1.22592                 | PF-0047736 up vs DMSO   |
| 15180  | 8006621 CCL4L1     | NM_001001435 | 0.00279162  | 4.27813 | 4.27813 | 0.00279162  | 1.25788  | 1.25788                 | PF-0047736 up vs DMSO   |
| 164181 | 8019956 CCL4L1     | NM_001001435 | 0.00279162  | 4.27813 | 4.27813 | 0.00279162  | 1.25788  | 1.25788                 | PF-0047736 up vs DMSO   |
| 24750  | 8102643 CCN2A      | NM_0012327   | 0.0266283   | 10.3479 | 10.3479 | 0.0266283   | 0.713243 | -1.40205                | PF-0047736 down vs DMSO |
| 20400  | 8095870 CCN2G      | NM_0004554   | 0.00494543  | 7.42329 | 7.42329 | 0.00494543  | 1.82447  | 1.82447                 | PF-0047736 up vs DMSO   |
| 23593  | 8091658 CCN1L      | NM_020307    | 0.000566784 | 8.7314  | 8.7314  | 0.000566784 | 1.64698  | 1.64698                 | PF-0047736 up vs DMSO   |
| 19101  | 8045381 CCN2T      | NM_058241    | 0.0242315   | 8.61383 | 8.61383 | 0.0242315   | 1.25133  | 1.25133                 | PF-0047736 up vs DMSO   |
| 19757  | 8052562 CCT4       | NM_006430    | 0.00366289  | 10.3033 | 10.3033 | 0.00366289  | 0.666096 | -1.50128                | PF-0047736 down vs DMSO |
| 24966  | 8104449 CCT5       | NM_012073    | 0.00538542  | 10.9554 | 10.9554 | 0.00538542  | 0.712589 | -1.40333                | PF-0047736 down vs DMSO |
| 27900  | 8132943 CCT6A      | NM_001762    | 0.0302095   | 10.0295 | 10.0295 | 0.0302095   | 0.745382 | -1.34159                | PF-0047736 down vs DMSO |
| 17455  | 8029688 CCZAFP     | NM_012099    | 0.0393091   | 7.01076 | 7.01076 | 0.0393091   | 0.626257 | -1.31189                | PF-0047736 down vs DMSO |
| 10678  | 7901075 CDB9       | NM_00159334  | 0.00169334  | 6.42376 | 6.42376 | 0.00169334  | 3.16956  | 3.16956                 | PF-0047736 up vs DMSO   |
| 25716  | 8112053 CDC20B     | NM_152623    | 0.000645219 | 4.08815 | 4.08815 | 0.000645219 | 1.26152  | 1.26152                 | PF-0047736 up vs DMSO   |
| 21613  | 8071212 CDC4C      | NM_001178010 | 0.04615     | 9.42691 | 9.42691 | 0.04615     | 0.634949 | -1.57493                | PF-0047736 down vs DMSO |
| 19204  | 8046488 CDC47      | NM_031942    | 0.0445873   | 9.15336 | 9.15336 | 0.0445873   | 0.754847 | -1.32477                | PF-0047736 down vs DMSO |
| 10230  | 7956076 CDK2       | NM_001798    | 0.036415    | 9.58721 | 9.58721 | 0.036415    | 0.26673  | -1.37613                | PF-0047736 down vs DMSO |
| 10991  | 7964522 CDK4       | NM_000075    | 0.029788    | 10.9537 | 10.9537 | 0.029788    | 0.743493 | -1.345                  | PF-0047736 down vs DMSO |
| 29077  | 8143850 CDK5       | NM_004935    | 0.0338712   | 8.27637 | 8.27637 | 0.0338712   | 0.656298 | -1.52377                | PF-0047736 down vs DMSO |
| 24317  | 8098555 CDKN2AIP   | NM_014978    | 0.049068    | 7.99978 | 7.99978 | 0.049068    | 1.38597  | 1.38597                 | PF-0047736 up vs DMSO   |
| 17871  | 8034075 CDKN2D     | NM_001800    | 0.023961    | 6.90404 | 6.90404 | 0.023961    | 1.22126  | -1.22126                | PF-0047736 down vs DMSO |
| 20787  | 8063386 CE8PB      | NM_005194    | 0.00120031  | 7.71196 | 7.71196 | 0.00120031  | 2.11244  | 2.11244                 | PF-0047736 up vs DMSO   |
| 17242  | 8027566 CE8PB      | NM_001806    | 0.0383159   | 8.01499 | 8.01499 | 0.0383159   | 1.44392  | 1.44392                 | PF-0047736 up vs DMSO   |
| 29188  | 8064762 CENPB      | NM_001810    | 0.0427772   | 7.19438 | 7.19438 | 0.0427772   | 0.806817 | -1.23944                | PF-0047736 down vs DMSO |
| 25109  | 8105842 CENPH      | NM_022909    | 0.00181882  | 7.63116 | 7.63116 | 0.00181882  | 0.642396 | -1.55667                | PF-0047736 down vs DMSO |
| 20478  | 8156341 CENPP      | NM_001012267 | 0.0446794   | 8.02713 | 8.02713 | 0.0446794   | 0.749607 | -1.33403                | PF-0047736 down vs DMSO |
| 30667  | 8158250 CERCAM     | NM_016174    | 0.0329844   | 6.57449 | 6.57449 | 0.0329844   | 0.740939 | -1.34964                | PF-0047736 down vs DMSO |
| 30002  | 8179351 CFB        | NM_001710    | 0.0412379   | 5.3873  | 5.3873  | 0.0412379   | 0.88272  | -1.13286                | PF-0047736 down vs DMSO |
| 9531   | 7949496 CFL1       | NM_005507    | 0.0385854   | 11.9571 | 11.9571 | 0.0385854   | 0.801707 | -1.24734                | PF-0047736 down vs DMSO |
| 18309  | 8038288 CG81       | NM_033377    | 0.0494712   | 5.68214 | 5.68214 | 0.0494712   | 1.09671  | 1.09671                 | PF-0047736 up vs DMSO   |
| 19229  | 7982868 CHA1C      | NM_024111    | 0.0486471   | 7.53308 | 7.53308 | 0.0486471   | 2.10011  | 2.10011                 | PF-0047736 up vs DMSO   |
| 21334  | 8068478 CHAF1B     | NM_005441    | 0.0349435   | 8.88197 | 8.88197 | 0.0349435   | 0.699145 | -1.48032                | PF-0047736 down vs DMSO |
| 21998  | 8074939 CHCHD10    | NM_213720    | 0.0362752   | 8.83012 | 8.83012 | 0.0362752   | 0.263255 | -1.37679                | PF-0047736 down vs DMSO |
| 23029  | 8085481 CHCHD4     | NM_144636    | 0.0082342   | 6.31061 | 6.31061 | 0.0082342   | 0.751327 | -1.33098                | PF-0047736 down vs DMSO |
| 22028  | 8075164 CHEK2      | NM_001005735 | 0.0278447   | 6.85039 | 6.85039 | 0.0278447   | -1.34531 | PF-0047736 down vs DMSO |                         |
| 24518  | 8100382 CHIC2      | NM_021110    | 0.0396179   | 9.00693 | 9.00693 | 0.0396179   | 1.29527  | 1.29527                 | PF-0047736 up vs DMSO   |
| 90851  | 7945579 CHKB1      | NM_0307824   | 0.0273549   | 7.95661 | 7.95661 | 0.0273549   | 0.792656 | -1.25917                | PF-0047736 down vs DMSO |
| 22224  | 8077123 CHKC-OPT1B | NM_027928    | 0.0384549   | 7.43108 | 7.43108 | 0.0384549   | 1.28337  | 1.28337                 | PF-0047736 up vs DMSO   |
| 17969  | 8035110 CIB3       | NM_054113    | 0.0319345   | 4.5756  | 4.5756  | 0.0319345   | 1.11151  | 1.11151                 | PF-0047736 up vs DMSO   |
| 4801   | 7902721 CLC1A      | NM_001285    | 0.0437      | 3.07867 | 3.07867 | 0.0437      | 0.952599 | -1.04976                | PF-0047736 down vs DMSO |
| 10680  | 7961091 CLEC2A     | NM_001130711 | 0.0210509   | 3.15237 | 3.15237 | 0.0210509   | 1.11782  | 1.11782                 | PF-0047736 up vs DMSO   |
| 17004  | 8025303 CLEC4M     | NM_026707    | 0.00136035  | 4.41121 | 4.41121 | 0.00136035  | 0.881053 | -1.13501                | PF-0047736 down vs DMSO |
| 21323  | 8068383 CLUC6      | NM_0053277   | 0.0080592   | 3.82318 | 3.82318 | 0.0080592   | 1.13651  | 1.13651                 | PF-0047736 up vs DMSO   |
| 20285  | 8058127 CLK1       | NM_027856    | 0.0200307   | 8.38574 | 8.38574 | 0.0200307   | 1.64318  | 1.64318                 | PF-0047736 up vs DMSO   |
| 25559  | 8110803 CMT1M1     | NM_037825    | 0.0248302   | 10.0144 | 10.0144 | 0.0248302   | 0.793833 | -1.25917                | PF-0047736 down vs DMSO |
| 5989   | 7914851 CLSPN      | NM_022111    | 0.0408708   | 7.93717 | 7.93717 | 0.0408708   | 0.682213 | -1.46582                | PF-0047736 down vs DMSO |
| 23312  | 8088866 CNTN3      | NM_020872    | 0.0128599   | 6.37008 | 6.37008 | 0.0128599   | 0.856675 | -1.1673                 | PF-0047736 down vs DMSO |
| 14971  | 8004741 CNTR0B     | NM_001037144 | 0.0201842   | 7.42439 | 7.42439 | 0.0201842   | 1.30821  | 1.30821                 | PF-0047736 up vs DMSO   |
| 25529  | 7990436 COX5A      | NM_004255    | 0.00192346  | 10.6663 | 10.6663 | 0.00192346  | 0.796003 | -1.25628                | PF-0047736 down vs DMSO |
| 18913  | 8043718 COX5B      | NM_001862    | 0.0156192   | 10.3827 | 10.3827 | 0.0156192   | 0.710011 | -1.40843                | PF-0047736 down vs DMSO |
| 26513  | 8119153 COX6A1     | NM_004373    | 0.0285419   | 11.2744 | 11.2744 | 0.0285419   | 0.874198 | -1.43491                | PF-0047736 down vs DMSO |
| 10504  | 7959153 COX6A1     | NM_004373    | 0.0394007   | 11.628  | 11.628  | 0.0394007   | 0.873729 | -1.44552                | PF-0047736 down vs DMSO |
| 12778  | 8027932 COWB1      | NM_001863    | 0.0248302   | 10.0144 | 10.0144 | 0.0248302   | 0.793833 | -1.25917                | PF-0047736 down vs DMSO |
| 26245  | 8136217 CP4S       | NM_001127441 | 0.0387182   | 4.03439 | 4.03439 | 0.0387182   | 1.09832  | 1.09832                 | PF-0047736 up vs DMSO   |
| 31753  | 8168638 CPXCR1     | NM_033048    | 0.0429409   | 3.34297 | 3.34297 | 0.0429409   | 1.13926  | 1.13926                 | PF-0047736 up vs DMSO   |
| 19344  | 8047839 CREB1      | NM_004379    | 0.0385602   | 9.91516 | 9.91516 | 0.0385602   | 1.20324  | 1.20324                 | PF-0047736 up vs DMSO   |
| 20332  | 8058524 CRYGC      | NM_020989    | 0.0437557   | 5.27804 | 5.27804 | 0.0437557   | 1.08282  | 1.08282                 | PF-0047736 up vs DMSO   |
| 10630  | 7964064 CS         | NM_004077    | 0.00918954  | 10.55   | 10.55   | 0.00918954  | 0.818422 | -1.22186                | PF-0047736 down vs DMSO |
| 20776  | 8063283 CSE1L      | NM_001316    | 0.0117323   | 10.8281 | 10.8281 | 0.0117323   | 0.689617 | -1.45008                | PF-0047736 down vs DMSO |
| 7228   | 7927146 CSGALNACT2 | NM_018590    | 0.0246343   | 7.55457 | 7.55457 | 0.0246343   | 1.37305  | 1.37305                 | PF-0047736 up vs DMSO   |
| 23150  | 8086799 CPBG5      | NM_006574    | 0.0171771   | 4.98032 | 4.98032 | 0.0171771   | 0.888997 | -1.24886                | PF-0047736 down vs DMSO |
| 11971  | 7914008 CPB1       | NM_0052927   | 0.0092923   | 6.60933 | 6.60933 | 0.0092923   | 1.165577 | 1.165577                | PF-0047736 up vs DMSO   |
| 4502   | 7900510 CTP5       | NM_001905    | 0.0489636   | 9.86796 | 9.86796 | 0.0489636   | 0.774446 | -1.29124                | PF-0047736 down vs DMSO |
| 7785   | 7933047 CUL2       | NM_003591    | 0.0191242   | 8.624   | 8.624   | 0.0191242   | 0.819168 | -1.22075                | PF-0047736 down vs DMSO |
| 27200  | 8125752 CUTA       | NM_015921    | 0.0349932   | 9.37622 | 9.37622 | 0.0349932   | 0.810525 | -1.23377                | PF-0047736 down vs DMSO |
| 30185  | 8153819 CYHR1      | NM_138496    | 0.0399647   | 6.82786 | 6.82786 | 0.0399647   | 1.47627  | 1.47627                 | PF-0047736 up vs DMSO   |
| 11810  | 7972699 DAOA       | NM_001161812 | 0.0126497   | 3.98779 | 3.98779 | 0.0126497   | 0.85404  | -1.1709                 | PF-0047736 down vs DMSO |
| 9456   | 7960320 DC1PB      | NM_152640    | 0.0214224   | 7.94281 | 7.94281 | 0.0214224   | 1.52663  | 1.52663                 | PF-0047736 up vs DMSO   |
| 14597  | 8000864 DCTP1      | NM_024096    | 0.0376708   | 10.8157 | 10.8157 | 0.0376708   | 0.696416 | -1.43592                | PF-0047736 down vs DMSO |
| 10442  | 7948254 DDB1       | NM_001921    | 0.0386602   | 10.0151 | 10.0151 | 0.0386602   | 0.864086 | -1.5729                 | PF-0047736 down vs DMSO |
| 10987  | 7964460 DDIT3      | NM_001195053 | 6.06E-05    | 6.97175 | 6.97175 | 6.06E-05    | 3.32494  | 3.32494                 | PF-0047736 up vs DMSO   |
| 25329  | 8108134 DDW46      | NM_014829    | 0.00187593  | 9.37102 | 9.37102 | 0.00187593  | 0.830976 | -1.20976                | PF-0047736 down vs DMSO |
| 11201  | 7966570 DDX54      | NM_00111322  | 0.0497549   | 8.88389 | 8.88389 | 0.0497549   | 0.812695 | -1.23047                | PF-0047736 down vs DMSO |
| 11222  | 7965760 DEPDC4     | NM_152317    | 0.0373089   | 4.41121 | 4.41121 | 0.0373089   | 0.704859 | -1.41872                | PF-0047736 down vs DMSO |
| 9596   | 7950067 DHC8       | NM_001360    | 0.00439928  | 9.38179 | 9.38179 | 0.00439928  | 0.586244 | -1.70577                | PF-0047736 down vs DMSO |
| 16739  | 8022640 DHR8       | NM_000791    | 0.0101205   | 10.1791 | 10.1791 | 0.0101205   | 0.766837 | -1.35715                | PF-0047736 down vs DMSO |
| 25819  | 8112902 DHR9       | NM_000791    | 0.0124174   | 9.99694 | 9.99694 | 0.0124174   | 0.744915 | -1.34244                | PF-0047736 down vs DMSO |
| 79711  | 8142408 DHDH       | NM_00100728  | 6.91561     | 7.26139 | 7.26139 | 6.91561     | 0.714151 | -1.3141                 | PF-0047736 down vs DMSO |
| 15849  | 8013804 DHDX13     | NM_144683    | 0.0401491   | 9.26139 | 9.26139 | 0.0401491   | 0.847082 | -1.18052                | PF-0047736 down vs DMSO |
| 24438  | 8099649 DHDX15     | NM_001358    | 0.00265058  | 10.1406 | 10.1406 | 0.00265058  | 0.827898 | -1.20788                | PF-0047736 down vs DMSO |
| 15659  | 8011861 DHDX3      | NM_020162    | 0.0352407   | 9.08126 | 9.08126 | 0.0352407   | 0.772377 | -1.2947                 | PF-0047736 down vs DMSO |
| 17459  | 8029918 DHDX3A     | NM_014681    | 0.00922351  | 7.20981 | 7.20981 | 0.00922351  | 0.814766 | -1.22735                | PF-0047736 down vs DMSO |
| 31080  | 8162254 DIRAS2     | NM_017594    | 0.0355159   | 5.40738 | 5.40738 | 0.0355159   | 0.894357 | -1.1812                 | PF-0047736 down vs DMSO |
| 31032  | 8170971 DLK1       | NM_001363    | 0.0198284   | 9.28777 | 9.28777 | 0.0198284   | 0.673962 | -1.48376                | PF-0047736 down vs DMSO |
| 12429  | 7969171 DLEU1      | NM_002605    | 0.0483094   | 7.83442 | 7.83442 | 0.0483094   | 0.668877 | -1.49504                | PF-0047736 down vs DMSO |
| 7892   | 7934025 DNAB2      | NM_001060449 | 0.0022152   | 6.92224 | 6.92224 | 0.0022152   | 0.658299 | -1.51784                | PF-0047736 down vs DMSO |
| 24296  | 8008026 DNAB1      | NM_015512    | 0.00431908  | 6.39122 | 6.39122 | 0.00431908  | 1.53861  | 1.53861                 | PF-0047736 up vs DMSO   |
| 14522  | 8000034 DNAB3      | NM_017539    | 3.9101      | 3.9101  | 3.9101  | 0.0140983   | 1.13638  | 1.13638                 | PF-0047736 up vs DMSO   |
| 20267  | 8057821 DNAB7      | NM_018897    | 0.0397325   | 3.81686 | 3.81686 | 0.0397325   |          |                         |                         |

|       |                   |                 |             |         |         |             |          |                                   |
|-------|-------------------|-----------------|-------------|---------|---------|-------------|----------|-----------------------------------|
| 25612 | 8110920 FASTK03   | NM_024091       | 0.0127795   | 6.76742 | 6.76742 | 0.0127795   | 0.701131 | -1.42627 PF-0047736 down vs DMSO  |
| 30941 | 8161229 F8X010    | NM_012166       | 0.0062282   | 8.9888  | 8.9888  | 0.0062282   | 0.853848 | -1.16503 PF-0047736 down vs DMSO  |
| 22972 | 8084947 F8X045    | NM_00105573     | 0.0347105   | 8.05269 | 8.05269 | 0.0347105   | 0.71125  | -1.40597 PF-0047736 down vs DMSO  |
| 15785 | 805273 F8X046     | NM_00105680     | 0.0224551   | 5.14562 | 5.14562 | 0.0224551   | 1.34054  | -1.54057 PF-0047736 up vs DMSO    |
| 24889 | 8103755 F8X028    | NM_012180       | 0.0224551   | 7.13996 | 7.13996 | 0.0224551   | 1.33455  | -1.33455 PF-0047736 up vs DMSO    |
| 5150  | 7905986 F0P5      | NM_002004       | 0.00800511  | 8.61885 | 8.61885 | 0.00800511  | 0.470544 | -1.40544 PF-0047736 down vs DMSO  |
| 28739 | 8140420 F0P5L2A   | NR_003262       | 0.00211256  | 6.72305 | 6.72305 | 0.00211256  | 0.780475 | -1.28127 PF-0047736 down vs DMSO  |
| 28742 | 8140443 F0P5L2A   | NR_003262       | 0.00311354  | 6.8963  | 6.8963  | 0.00311354  | 0.782936 | -1.27724 PF-0047736 down vs DMSO  |
| 8585  | 7940561 FEN1      | NM_004111       | 0.0126836   | 8.92887 | 8.92887 | 0.0126836   | 0.738109 | -1.35481 PF-0047736 down vs DMSO  |
| 7047  | 7925480 FH        | NM_000143       | 0.0466112   | 8.27836 | 8.27836 | 0.0466112   | 0.721546 | -1.38591 PF-0047736 down vs DMSO  |
| 28619 | 8139632 FHG1L1    | NM_001042762    | 0.00152777  | 7.75019 | 7.75019 | 0.00152777  | 0.703559 | -1.17774 PF-0047736 down vs DMSO  |
| 5136  | 790561 FLD1       | NM_025369       | 0.0032109   | 6.89168 | 6.89168 | 0.0032109   | 0.894979 | -1.11734 PF-0047736 up vs DMSO    |
| 10084 | 7954692 FLJ2324   | NR_026806       | 0.0033271   | 5.45113 | 5.45113 | 0.0033271   | 1.36268  | -1.36268 PF-0047736 down vs DMSO  |
| 14309 | 7997832 FLJ40448  | ENST00000333666 | 0.0458412   | 8.57552 | 8.57552 | 0.0458412   | 1.12949  | -1.12949 PF-0047736 up vs DMSO    |
| 9346  | 7947969 FNBPA     | NM_015308       | 0.0292954   | 9.79169 | 9.79169 | 0.0292954   | 1.25838  | -1.25838 PF-0047736 up vs DMSO    |
| 12132 | 7975779 FOS       | NM_005252       | 0.000197284 | 6.0491  | 6.0491  | 0.000197284 | 2.40401  | -2.40401 PF-0047736 up vs DMSO    |
| 17436 | 8029693 FOSB      | NM_006732       | 0.022821    | 6.063   | 6.063   | 0.022821    | 1.51044  | -1.51044 PF-0047736 up vs DMSO    |
| 30408 | 8155661 F0XD43    | NM_199135       | 0.0299139   | 6.61952 | 6.61952 | 0.0299139   | 1.1654   | -1.1654 PF-0047736 up vs DMSO     |
| 31585 | 8167270 FTSJ1     | NM_177439       | 0.0186387   | 8.51149 | 8.51149 | 0.0186387   | 0.7736   | -1.29266 PF-0047736 down vs DMSO  |
| 6211  | 7917156 FUPB1     | NM_0207035      | 0.0407035   | 10.3607 | 10.3607 | 0.0407035   | 0.871693 | -1.17479 PF-0047736 down vs DMSO  |
| 30412 | 8155609 FVN       | NM_000144       | 0.00559876  | 9.17056 | 9.17056 | 0.00559876  | 0.716349 | -1.39597 PF-0047736 down vs DMSO  |
| 5246  | 8109368 G3BP1     | NM_005754       | 0.0085508   | 11.0232 | 11.0232 | 0.0085508   | 0.820936 | -1.21812 PF-0047736 down vs DMSO  |
| 4751  | 7902227 GADD45A   | NM_001924       | 0.0445687   | 6.61769 | 6.61769 | 0.0445687   | 2.16306  | -2.16306 PF-0047736 up vs DMSO    |
| 30473 | 8156309 GADD45G   | NM_006705       | 0.0272798   | 5.16824 | 5.16824 | 0.0272798   | 1.2835   | -1.2835 PF-0047736 up vs DMSO     |
| 9947  | 7953385 GAPDH     | NM_002046       | 0.0296038   | 13.2951 | 13.2951 | 0.0296038   | 0.886596 | -1.12791 PF-0047736 down vs DMSO  |
| 21943 | 8070102 GART      | NM_000819       | 0.0431011   | 9.08465 | 9.08465 | 0.0431011   | 0.76037  | -1.31515 PF-0047736 down vs DMSO  |
| 17186 | 8027169 GATAD2A   | NM_017660       | 0.0401982   | 9.83347 | 9.83347 | 0.0401982   | 0.783339 | -1.27659 PF-0047736 down vs DMSO  |
| 18959 | 8044236 GCC2      | NM_181453       | 0.0188866   | 8.14293 | 8.14293 | 0.0188866   | 1.43669  | -1.43669 PF-0047736 up vs DMSO    |
| 13017 | 7983880 GCOA1     | NM_001038100    | 0.0245888   | 3.9922  | 3.9922  | 0.0245888   | 1.09222  | -1.09222 PF-0047736 up vs DMSO    |
| 26028 | 8114778 GCSH      | NM_004483       | 0.00776778  | 9.47764 | 9.47764 | 0.00776778  | 0.565235 | -1.52153 PF-0047736 down vs DMSO  |
| 14810 | 8002999 GCSH      | NM_004483       | 0.0153004   | 8.60373 | 8.60373 | 0.0153004   | 0.660627 | -1.51371 PF-0047736 down vs DMSO  |
| 6709  | 7922104 GCSH      | NM_004483       | 0.0165417   | 8.78128 | 8.78128 | 0.0165417   | 0.659216 | -1.56195 PF-0047736 down vs DMSO  |
| 26092 | 8115410 GEMINS    | NM_015465       | 0.038014    | 8.68686 | 8.68686 | 0.038014    | 0.78484  | -1.27854 PF-0047736 down vs DMSO  |
| 28535 | 8138857 GGCT      | NM_024051       | 0.0100993   | 8.11737 | 8.11737 | 0.0100993   | 0.750414 | -1.3326 PF-0047736 down vs DMSO   |
| 14829 | 8003204 GINS2     | NM_016095       | 0.021434    | 10.4235 | 10.4235 | 0.021434    | 0.670349 | -1.49176 PF-0047736 down vs DMSO  |
| 24864 | 8103555 GK3P      | NR_02675        | 0.0300273   | 8.74261 | 8.74261 | 0.0300273   | 0.772944 | -1.23975 PF-0047736 down vs DMSO  |
| 11498 | 8004913 GLR1      | NM_000425       | 0.0455119   | 8.4261  | 8.4261  | 0.0455119   | 1.14101  | -1.14101 PF-0047736 up vs DMSO    |
| 7627  | 7913193 GLR3      | NM_006541       | 0.00301499  | 8.62232 | 8.62232 | 0.00301499  | 0.823273 | -1.21466 PF-0047736 down vs DMSO  |
| 12205 | 7976515 GLR5      | NM_016417       | 0.00921594  | 9.13837 | 9.13837 | 0.00921594  | 0.843375 | -1.18571 PF-0047736 down vs DMSO  |
| 31886 | 8169709 GLR5      | NM_016417       | 0.0217093   | 9.72939 | 9.72939 | 0.0217093   | 0.782746 | -1.27755 PF-0047736 down vs DMSO  |
| 11755 | 8026806 GLT25D1   | NM_024656       | 0.00773513  | 9.12444 | 9.12444 | 0.00773513  | 0.740103 | -1.35116 PF-0047736 down vs DMSO  |
| 7145  | 7965941 GLTRD2    | NM_031302       | 0.0425774   | 4.1683  | 4.1683  | 0.0425774   | 1.11047  | -1.11047 PF-0047736 up vs DMSO    |
| 18755 | 8042487 GMLC1     | NM_178439       | 0.0224123   | 9.02184 | 9.02184 | 0.0224123   | 0.865016 | -1.15665 PF-0047736 down vs DMSO  |
| 22820 | 8083523 GMP5      | NM_003875       | 0.0394505   | 10.9421 | 10.9421 | 0.0394505   | 0.716038 | -1.39657 PF-0047736 down vs DMSO  |
| 1358  | 7990283 GMP5      | NM_001038640    | 0.0074624   | 5.55455 | 5.55455 | 0.0074624   | 1.14101  | -1.14101 PF-0047736 up vs DMSO    |
| 13120 | 7984961 GOLGA6B   | NM_018652       | 0.00385851  | 5.53683 | 5.53683 | 0.00385851  | 1.17483  | -1.17483 PF-0047736 up vs DMSO    |
| 13096 | 7984662 GOLGA6B   | NM_018652       | 0.00679009  | 5.47147 | 5.47147 | 0.00679009  | 1.12296  | -1.12296 PF-0047736 up vs DMSO    |
| 12857 | 7982230 GOLGA8IP  | NR_024074       | 0.0187204   | 5.17564 | 5.17564 | 0.0187204   | 1.17382  | -1.17382 PF-0047736 up vs DMSO    |
| 13344 | 7987114 GOLGA8IP  | NR_024074       | 0.023989    | 5.10663 | 5.10663 | 0.023989    | 1.1899   | -1.1899 PF-0047736 up vs DMSO     |
| 13327 | 7986947 GOLGA8IP  | NR_024074       | 0.0331094   | 5.16453 | 5.16453 | 0.0331094   | 1.1528   | -1.1528 PF-0047736 up vs DMSO     |
| 6932  | 7924327 GPATCH2   | NM_018040       | 0.0234231   | 7.37531 | 7.37531 | 0.0234231   | 1.31641  | -1.31641 PF-0047736 up vs DMSO    |
| 20932 | 8064868 GPCPD1    | NM_019593       | 0.0382708   | 8.08202 | 8.08202 | 0.0382708   | 1.50841  | -1.50841 PF-0047736 up vs DMSO    |
| 14478 | 7999532 GSP1      | NM_002994       | 0.00838192  | 10.7484 | 10.7484 | 0.00838192  | 0.758435 | -1.131851 PF-0047736 down vs DMSO |
| 29784 | 8150103 GTF2E2    | NM_002095       | 0.0202119   | 8.24818 | 8.24818 | 0.0202119   | 0.768251 | -1.30166 PF-0047736 down vs DMSO  |
| 17799 | 8033135 GTF2F1    | NM_002096       | 0.0458962   | 8.8509  | 8.8509  | 0.0458962   | 1.13283  | -1.13283 PF-0047736 up vs DMSO    |
| 28717 | 8140170 GTF2R202  | NM_173537       | 0.0424131   | 6.81118 | 6.81118 | 0.0424131   | 1.88474  | -1.88474 PF-0047736 up vs DMSO    |
| 27996 | 8133549 GTF2R202B | NM_001003795    | 0.0342756   | 6.76498 | 6.76498 | 0.0342756   | 1.98757  | -1.98757 PF-0047736 up vs DMSO    |
| 71550 | 8026735 GTPBP3    | NM_133644       | 0.0111448   | 7.75813 | 7.75813 | 0.0111448   | 0.770904 | -1.29718 PF-0047736 down vs DMSO  |
| 16293 | 8018439 H3F3C     | NM_005324       | 0.0126538   | 10.7359 | 10.7359 | 0.0126538   | 1.30168  | -1.30168 PF-0047736 up vs DMSO    |
| 10789 | 7962194 H3F3C     | NM_001013699    | 0.0306208   | 10.1205 | 10.1205 | 0.0306208   | 1.2295   | -1.2295 PF-0047736 up vs DMSO     |
| 24887 | 8103745 HAMD2     | NM_021973       | 0.0245924   | 4.79882 | 4.79882 | 0.0245924   | 1.11669  | -1.11669 PF-0047736 up vs DMSO    |
| 15151 | 8086345 HAT1      | NM_002546       | 0.078744    | 9.75444 | 9.75444 | 0.078744    | 0.735466 | -1.27356 PF-0047736 down vs DMSO  |
| 14370 | 8089885 HAUS3     | NM_024511       | 0.0473789   | 6.97286 | 6.97286 | 0.0473789   | 0.893585 | -1.11909 PF-0047736 down vs DMSO  |
| 32595 | 815782 HAUS5      | NM_017518       | 0.00125199  | 7.10281 | 7.10281 | 0.00125199  | 0.825809 | -1.21093 PF-0047736 down vs DMSO  |
| 32986 | 8179235 HCG27     | NR_026791       | 0.0412472   | 6.2915  | 6.2915  | 0.0412472   | 1.22384  | -1.22384 PF-0047736 up vs DMSO    |
| 26024 | 8114691 HDAC3     | NM_003883       | 0.0350281   | 10.2154 | 10.2154 | 0.0350281   | 0.850848 | -1.1753 PF-0047736 down vs DMSO   |
| 14093 | 7995456 HEATR3    | NM_182922       | 0.0487352   | 6.76621 | 6.76621 | 0.0487352   | 0.873307 | -1.14507 PF-0047736 down vs DMSO  |
| 4869  | 7903401 HEI1      | NR_033424       | 0.0396715   | 3.91976 | 3.91976 | 0.0396715   | 0.895588 | -1.11658 PF-0047736 down vs DMSO  |
| 14134 | 7958955 HERPUD1   | NM_014669       | 0.0114699   | 8.82082 | 8.82082 | 0.0114699   | 1.74711  | -1.74711 PF-0047736 up vs DMSO    |
| 30475 | 8007745 HHT1      | NM_005493       | 0.0169937   | 7.85744 | 7.85744 | 0.0169937   | 1.50959  | -1.50959 PF-0047736 down vs DMSO  |
| 30407 | 8156538 HIAT1L    | NM_032558       | 0.0182373   | 9.56437 | 9.56437 | 0.0182373   | 0.748478 | -1.33604 PF-0047736 down vs DMSO  |
| 27052 | 8124307 HIST1H1C  | NM_005319       | 0.0110902   | 9.55577 | 9.55577 | 0.0110902   | 1.38018  | -1.38018 PF-0047736 up vs DMSO    |
| 27058 | 8124430 HIST1H1D  | NM_005320       | 0.0400157   | 9.13828 | 9.13828 | 0.0400157   | 1.40267  | -1.40267 PF-0047736 up vs DMSO    |
| 27050 | 8124391 HIST1H2AB | NM_003513       | 0.000272876 | 9.18365 | 9.18365 | 0.000272876 | 1.79793  | -1.79793 PF-0047736 up vs DMSO    |
| 26312 | 8117372 HIST1H2AC | NM_003512       | 0.00331293  | 9.9831  | 9.9831  | 0.00331293  | 1.38545  | -1.38545 PF-0047736 up vs DMSO    |
| 26336 | 8117535 HIST1H2AG | NM_021064       | 0.0123625   | 7.89372 | 7.89372 | 0.0123625   | 1.46975  | -1.46975 PF-0047736 up vs DMSO    |
| 26338 | 8117543 HIST1H2AI | NM_080596       | 0.00830262  | 8.00437 | 8.00437 | 0.00830262  | 1.39007  | -1.39007 PF-0047736 up vs DMSO    |
| 26316 | 8117545 HIST1H2AJ | NM_003522       | 0.00308947  | 10.3069 | 10.3069 | 0.00308947  | 1.02340  | -1.02340 PF-0047736 up vs DMSO    |
| 26347 | 8117580 HIST1H2AK | NM_003509       | 0.00280351  | 10.2854 | 10.2854 | 0.00280351  | 1.53093  | -1.53093 PF-0047736 up vs DMSO    |
| 27077 | 8124518 HIST1H2AL | NM_021066       | 0.000393236 | 6.03981 | 6.03981 | 0.000393236 | 5.14566  | -5.14566 PF-0047736 up vs DMSO    |
| 27079 | 8124524 HIST1H2AK | NM_003510       | 0.000106277 | 9.10732 | 9.10732 | 0.000106277 | 1.82333  | -1.82333 PF-0047736 up vs DMSO    |
| 26353 | 8117608 HIST1H2AM | NM_003511       | 0.00303833  | 9.15341 | 9.15341 | 0.00303833  | 1.50314  | -1.50314 PF-0047736 up vs DMSO    |
| 27084 | 8124540 HIST1H2AM | NM_003514       | 0.00168511  | 6.69658 | 6.69658 | 0.00168511  | 2.31115  | -2.31115 PF-0047736 up vs DMSO    |
| 27054 | 8124406 HIST1H2BC | NM_003526       | 0.0191889   | 8.87947 | 8.87947 | 0.0191889   | 1.36001  | -1.36001 PF-0047736 up vs DMSO    |
| 26314 | 8117382 HIST1H2BD | NM_021063       | 0.0362084   | 6.4851  | 6.4851  | 0.0362084   | 1.49275  | -1.49275 PF-0047736 up vs DMSO    |
| 26316 | 8117395 HIST1H2BF | NM_003522       | 0.0105254   | 10.4971 | 10.4971 | 0.0105254   | 1.42512  | -1.42512 PF-0047736 up vs DMSO    |
| 27070 | 8124484 HIST1H2BL | NM_021058       | 0.00151919  | 6.52787 | 6.52787 | 0.00151919  | 2.65774  | -2.65774 PF-0047736 up vs DMSO    |
| 27076 | 8124510 HIST1H2BL | NM_003519       | 0.00301598  | 7.6843  | 7.6843  | 0.00301598  | 1.53604  | -1.53604 PF-0047736 up vs DMSO    |
| 26352 | 8117600 HIST1H2BN | NM_003520       | 0.0473288   | 6.93623 | 6.93623 | 0.0473288   | 1.22984  | -1.22984 PF-0047736 up vs DMSO    |
| 26354 | 8117614 HIST1H2BO | NM_003527       | 0.00486751  | 6.99955 | 6.99955 | 0.00486751  | 1.71485  | -1.71485 PF-0047736 up vs DMSO    |
| 26309 | 8117339 HIST1H3C  | NM_003531       | 0.0411347   | 5.81755 | 5.81755 | 0.0411347   | 1.75124  | -1.75124 PF-0047736 up vs DMSO    |
| 27056 | 8124416 HIST1H3D  | NM_003530       | 0.00791956  | 11.9829 | 11.9829 |             |          |                                   |

|        |                      |                 |             |         |         |             |          |                                   |
|--------|----------------------|-----------------|-------------|---------|---------|-------------|----------|-----------------------------------|
| 18865  | 8043431 IGKC         | AF113887        | 0.00085922  | 4.86182 | 4.86182 | 0.00085922  | 1.19266  | 1.19266 PF-00477736 up vs DMSO    |
| 24016  | 8095680 IL8          | NM_000584       | 0.036437    | 5.3249  | 5.3249  | 0.036437    | 2.29928  | 2.29928 PF-00477736 up vs DMSO    |
| 28193  | 8135718 ING3         | NM_019071       | 0.0144377   | 8.31991 | 8.31991 | 0.0144377   | 1.48456  | 1.48456 PF-00477736 up vs DMSO    |
| 116339 | 7906304 INH4         | NM_034378       | 0.024388    | 4.23388 | 4.23388 | 0.024388    | 1.49135  | 1.49135 PF-00477736 up vs DMSO    |
| 11703  | 7971692 INT56        | NM_012141       | 0.0246469   | 6.84737 | 6.84737 | 0.0246469   | 1.28098  | 1.28098 PF-00477736 up vs DMSO    |
| 25083  | 8105545 IPO11        | NM_016338       | 0.0303231   | 9.11903 | 9.11903 | 0.0303231   | 0.77117  | -1.29673 PF-00477736 down vs DMSO |
| 11497  | 7969703 IPO5         | NM_002271       | 0.00988993  | 10.4093 | 10.4093 | 0.00988993  | 0.768135 | -1.30185 PF-00477736 down vs DMSO |
| 20451  | 8059878 IQCA1        | NM_024726       | 0.0430483   | 3.65086 | 3.65086 | 0.0430483   | 0.936928 | -1.06732 PF-00477736 down vs DMSO |
| 9071   | 7945462 IRF7         | NM_004031       | 0.0137811   | 6.85587 | 6.85587 | 0.0137811   | 1.2708   | -1.2708 PF-00477736 up vs DMSO    |
| 25297  | 8107814 ISOCl        | NM_016048       | 0.0370262   | 8.43087 | 8.43087 | 0.0370262   | 0.649481 | -1.53969 PF-00477736 down vs DMSO |
| 19552  | 8050176 ITGB1BP1     | NM_004763       | 0.0294936   | 8.29859 | 8.29859 | 0.0294936   | 0.759066 | -1.31741 PF-00477736 down vs DMSO |
| 18901  | 8043597 ITPR1L1      | NM_178465       | 0.0364927   | 5.62015 | 5.62015 | 0.0364927   | 0.986572 | -1.21734 PF-00477736 down vs DMSO |
| 6800   | 7912889 IWS1ABP      | NM_006469       | 0.0209311   | 9.32028 | 9.32028 | 0.0209311   | 0.757277 | -1.28911 PF-00477736 down vs DMSO |
| 11962  | 8035351 IAK3         | NM_000215       | 0.0131008   | 6.75287 | 6.75287 | 0.0131008   | 1.44871  | 1.44871 PF-00477736 up vs DMSO    |
| 7990   | 7916609 JUN          | NM_002228       | 0.000932141 | 5.9837  | 5.9837  | 0.000932141 | 5.3469   | 5.3469 PF-00477736 up vs DMSO     |
| 17077  | 8026047 JUNB         | NM_002229       | 0.0118988   | 7.7061  | 7.7061  | 0.0118988   | 1.75993  | 1.75993 PF-00477736 up vs DMSO    |
| 17997  | 8035445 JUND         | NM_005354       | 0.043722    | 8.10539 | 8.10539 | 0.043722    | 1.64645  | 1.64645 PF-00477736 up vs DMSO    |
| 8663   | 7941382 KATS         | NM_182710       | 0.046845    | 7.90823 | 7.90823 | 0.046845    | 1.15248  | 1.15248 PF-00477736 up vs DMSO    |
| 5803   | 7912629 KAZ          | NM_201628       | 0.031254    | 5.22826 | 5.22826 | 0.031254    | 0.938661 | -1.07427 PF-00477736 down vs DMSO |
| 7614   | 7903083 KDAMA        | NM_014662       | 0.0314289   | 8.1768  | 8.1768  | 0.0314289   | 1.30271  | 1.30271 PF-00477736 up vs DMSO    |
| 1467   | 8004671 KDM6B        | NM_00180024     | 0.00554689  | 7.55016 | 7.55016 | 0.00554689  | 1.66623  | 1.66623 PF-00477736 up vs DMSO    |
| 18606  | 8040802 KHK          | NM_000221       | 0.0251551   | 6.69091 | 6.69091 | 0.0251551   | 0.756622 | -1.32166 PF-00477736 down vs DMSO |
| 11929  | 7973732 KHNYY        | NM_015299       | 0.046657    | 6.07137 | 6.07137 | 0.046657    | 1.18675  | 1.18675 PF-00477736 up vs DMSO    |
| 15840  | 8013696 KIAA0100     | NM_014680       | 0.00429884  | 9.46555 | 9.46555 | 0.00429884  | 0.810469 | -1.23385 PF-00477736 down vs DMSO |
| 13532  | 7989647 KIAA0101     | NM_014736       | 0.0438412   | 10.7407 | 10.7407 | 0.0438412   | 0.628048 | -1.59224 PF-00477736 down vs DMSO |
| 24957  | 8104350 KIAA0947     | NM_015325       | 0.0401241   | 8.61422 | 8.61422 | 0.0401241   | 0.854184 | -1.17071 PF-00477736 down vs DMSO |
| 23400  | 8089659 KIAA1407     | AK032488        | 0.00906553  | 6.44786 | 6.44786 | 0.00906553  | 1.41472  | 1.41472 PF-00477736 up vs DMSO    |
| 17996  | 8035435 KIAA1683     | NM_001145504    | 0.0458675   | 5.78532 | 5.78532 | 0.0458675   | 1.22676  | 1.22676 PF-00477736 up vs DMSO    |
| 14918  | 8004057 KIF1C        | NM_005612       | 0.0379725   | 7.25728 | 7.25728 | 0.0379725   | 0.821764 | -1.23237 PF-00477736 down vs DMSO |
| 6832   | 7923233 KIF21B       | NM_017596       | 0.0257258   | 7.64913 | 7.64913 | 0.0257258   | 1.36853  | 1.36853 PF-00477736 up vs DMSO    |
| 17733  | 8032365 KLF16        | NM_031918       | 0.0156401   | 8.55352 | 8.55352 | 0.0156401   | 0.709622 | -1.4092 PF-00477736 down vs DMSO  |
| 17136  | 8026564 KLF2         | NM_016270       | 0.0416304   | 7.11067 | 7.11067 | 0.0416304   | 1.11165  | 1.11165 PF-00477736 up vs DMSO    |
| 7661   | 7931810 KLF6         | NM_001300       | 8.41E-05    | 7.30321 | 7.30321 | 8.41E-05    | 2.17448  | 2.17448 PF-00477736 up vs DMSO    |
| 26556  | 8119648 KLHDC3       | NM_057161       | 0.0412531   | 9.95736 | 9.95736 | 0.0412531   | 0.815715 | -1.25292 PF-00477736 down vs DMSO |
| 22902  | 8084219 KLHL24       | NM_017644       | 0.0187323   | 7.99444 | 7.99444 | 0.0187323   | 1.7793   | 1.7793 PF-00477736 up vs DMSO     |
| 21464  | 8009827 KRTPAP19-2   | NM_181608       | 0.0240666   | 3.42336 | 3.42336 | 0.0240666   | 0.924443 | -1.08173 PF-00477736 down vs DMSO |
| 32515  | 8175908 LAGC5        | NM_016532       | 0.0755733   | 7.52728 | 7.52728 | 0.0755733   | 1.26842  | -1.35172 PF-00477736 down vs DMSO |
| 23888  | 8004259 LAP3         | NM_015907       | 0.0408473   | 8.04866 | 8.04866 | 0.0408473   | 0.819031 | -1.22095 PF-00477736 down vs DMSO |
| 30748  | 8159275 LCN9         | NM_001001676    | 0.038244    | 3.91949 | 3.91949 | 0.038244    | 0.934836 | -1.06971 PF-00477736 down vs DMSO |
| 8372   | 7938777 LDHA         | NM_005566       | 0.00698046  | 12.0032 | 12.0032 | 0.00698046  | 0.634567 | -1.57588 PF-00477736 down vs DMSO |
| 18413  | 8039139 LENG1        | NM_024316       | 0.0073856   | 5.94074 | 5.94074 | 0.0073856   | 1.27048  | 1.27048 PF-00477736 up vs DMSO    |
| 13471  | 7988838 LEO1         | NM_138792       | 0.0128768   | 8.62665 | 8.62665 | 0.0128768   | 0.792382 | -1.26202 PF-00477736 down vs DMSO |
| 28210  | 8135909 LEP          | NM_000230       | 0.030361    | 5.47268 | 5.47268 | 0.030361    | 1.41484  | 1.41484 PF-00477736 up vs DMSO    |
| 18365  | 8038815 LIM2         | NM_030657       | 0.0488867   | 5.03955 | 5.03955 | 0.0488867   | 1.1281   | 1.1281 PF-00477736 up vs DMSO     |
| 110859 | 7963024 LIM3         | NM_006458       | 0.00949123  | 7.40362 | 7.40362 | 0.00949123  | 1.09475  | 1.09475 PF-00477736 up vs DMSO    |
| 5713   | 7911718 LOC100129534 | NR_020489       | 0.0451958   | 6.55142 | 6.55142 | 0.0451958   | 1.22017  | 1.22017 PF-00477736 up vs DMSO    |
| 19548  | 8050113 LOC100129581 | AK125905        | 0.0248198   | 5.72844 | 5.72844 | 0.0248198   | 0.866183 | -1.15449 PF-00477736 down vs DMSO |
| 14787  | 8002760 LOC100123246 | ENST00000412576 | 0.0483117   | 6.69911 | 6.69911 | 0.0483117   | 0.861078 | -1.46826 PF-00477736 down vs DMSO |
| 8654   | 7941269 LOC100291851 | ENST00000309775 | 0.0135662   | 6.74443 | 6.74443 | 0.0135662   | 0.886917 | -1.1275 PF-00477736 down vs DMSO  |
| 4933   | 7904082 LOC128322    | XM_001716411    | 0.046695    | 6.22629 | 6.22629 | 0.046695    | 0.807713 | -1.23806 PF-00477736 down vs DMSO |
| 18818  | 8043036 LOC1720      | NM_033423       | 0.0335124   | 9.76685 | 9.76685 | 0.0335124   | 1.32511  | -1.32511 PF-00477736 down vs DMSO |
| 15428  | 8009094 LOC342541    | ENST00000416490 | 0.0348965   | 8.04535 | 8.04535 | 0.0348965   | 0.834158 | -1.19881 PF-00477736 down vs DMSO |
| 11330  | 7968055 LOC74491     | NR_002815       | 0.00949123  | 3.82145 | 3.82145 | 0.00949123  | 1.09475  | 1.09475 PF-00477736 up vs DMSO    |
| 14150  | 7961660 LOC88282     | ENST00000335616 | 0.0419155   | 4.97592 | 4.97592 | 0.0419155   | 1.10984  | 1.10984 PF-00477736 up vs DMSO    |
| 18520  | 8040077 LOC400940    | NR_026883       | 0.0360237   | 3.87227 | 3.87227 | 0.0360237   | 1.12432  | 1.12432 PF-00477736 up vs DMSO    |
| 20453  | 8059902 LOC93463     | AL122100        | 0.0181868   | 4.59834 | 4.59834 | 0.0181868   | 1.10351  | 1.10351 PF-00477736 up vs DMSO    |
| 28848  | 8141535 LRCH4        | NM_002319       | 0.000634073 | 7.19613 | 7.19613 | 0.000634073 | 1.23764  | 1.23764 PF-00477736 up vs DMSO    |
| 18142  | 8036707 LRFN1        | NM_020862       | 0.0413699   | 6.33623 | 6.33623 | 0.0413699   | 0.758    | -1.31926 PF-00477736 down vs DMSO |
| 28253  | 8136315 LRGLX        | NM_144648       | 0.0291266   | 4.66012 | 4.66012 | 0.0291266   | 1.36692  | 1.36692 PF-00477736 up vs DMSO    |
| 4694   | 7901577 LRRCA2       | NM_052940       | 0.0192894   | 8.2777  | 8.2777  | 0.0192894   | 0.766293 | -1.30498 PF-00477736 down vs DMSO |
| 13404  | 7967916 LRRK5        | NM_153260       | 0.0170259   | 7.15224 | 7.15224 | 0.0170259   | 1.19565  | 1.19565 PF-00477736 up vs DMSO    |
| 81215  | 812515 LSM2          | NM_022569       | 0.0456249   | 8.60919 | 8.60919 | 0.0456249   | 0.820916 | -1.30216 PF-00477736 down vs DMSO |
| 32926  | 8187841 LSM4         | NM_021177       | 0.0456249   | 8.60919 | 8.60919 | 0.0456249   | 0.740265 | -1.36235 PF-00477736 down vs DMSO |
| 33050  | 8179839 LSM2         | NM_021177       | 0.0456249   | 8.60919 | 8.60919 | 0.0456249   | 0.734026 | -1.36235 PF-00477736 down vs DMSO |
| 21583  | 8070961 LSS          | NM_002340       | 0.00969321  | 8.34759 | 8.34759 | 0.00969321  | 0.610593 | -1.63775 PF-00477736 down vs DMSO |
| 10662  | 7954460 LYRMS5       | NM_001001660    | 0.0421667   | 7.92526 | 7.92526 | 0.0421667   | 1.18733  | 1.18733 PF-00477736 up vs DMSO    |
| 10667  | 7960933 M6PR         | NM_002355       | 0.0317937   | 9.96641 | 9.96641 | 0.0317937   | 0.775884 | -1.28885 PF-00477736 down vs DMSO |
| 21799  | 8073007 MAFF         | NM_012323       | 0.0185345   | 5.17878 | 5.17878 | 0.0185345   | 1.15646  | 1.15646 PF-00477736 up vs DMSO    |
| 10693  | 7961208 MACHDB       | NM_018048       | 0.034457    | 8.62102 | 8.62102 | 0.034457    | 0.82251  | -1.21579 PF-00477736 down vs DMSO |
| 16694  | 8121144 MAFA4        | NM_024641       | 0.033172    | 8.8404  | 8.8404  | 0.033172    | 0.728554 | -1.36454 PF-00477736 down vs DMSO |
| 14298  | 7997740 MAP1L3B      | NM_022818       | 0.000626127 | 6.50448 | 6.50448 | 0.000626127 | 2.04974  | 2.04974 PF-00477736 up vs DMSO    |
| 31261  | 8164177 MAPKAP1      | NM_001006617    | 0.0060394   | 9.28812 | 9.28812 | 0.0060394   | 0.740265 | -1.29822 PF-00477736 down vs DMSO |
| 16094  | 8016263 MAPT         | NM_016835       | 0.0289398   | 5.11276 | 5.11276 | 0.0289398   | 1.15567  | 1.15567 PF-00477736 up vs DMSO    |
| 18834  | 8043187 MAT2A        | NM_005911       | 0.0237438   | 11.6443 | 11.6443 | 0.0237438   | 0.805075 | -1.24212 PF-00477736 down vs DMSO |
| 17107  | 8027184 MAU2         | NM_015329       | 0.00317168  | 8.45566 | 8.45566 | 0.00317168  | 1.28051  | 1.28051 PF-00477736 up vs DMSO    |
| 4009   | 7994637 MAZ          | NM_001042539    | 0.0378781   | 8.54846 | 8.54846 | 0.0378781   | 0.884338 | -1.13079 PF-00477736 down vs DMSO |
| 10264  | 7956470 MB06         | NM_052897       | 0.00896392  | 7.81912 | 7.81912 | 0.00896392  | 1.19257  | 1.19257 PF-00477736 up vs DMSO    |
| 80823  | 8037878 MEG3         | NM_020160       | 0.0303043   | 6.69292 | 6.69292 | 0.0303043   | 0.628849 | -1.30289 PF-00477736 down vs DMSO |
| 27328  | 8127031 MCM3         | NM_002388       | 0.0384981   | 10.5511 | 10.5511 | 0.0384981   | 0.767667 | -1.30265 PF-00477736 down vs DMSO |
| 21767  | 8072687 MCM5         | NM_006739       | 0.0155688   | 9.99016 | 9.99016 | 0.0155688   | 0.735882 | -1.35891 PF-00477736 down vs DMSO |
| 20085  | 8055426 MCM6         | NM_005915       | 0.0200566   | 9.78709 | 9.78709 | 0.0200566   | 0.734218 | -1.36199 PF-00477736 down vs DMSO |
| 17728  | 8042259 MDH1         | NM_005917       | 0.0149784   | 9.14441 | 9.14441 | 0.0149784   | 0.798188 | -1.25284 PF-00477736 down vs DMSO |
| 18214  | 8032106 MED16        | NM_005481       | 0.0207336   | 8.288   | 8.288   | 0.0207336   | 0.882049 | -1.13372 PF-00477736 down vs DMSO |
| 9403   | 7948293 MED19        | NM_153450       | 0.04832     | 6.3719  | 6.3719  | 0.04832     | 1.16467  | 1.16467 PF-00477736 up vs DMSO    |
| 17399  | 8028645 MED29        | NM_017592       | 0.0119726   | 8.04259 | 8.04259 | 0.0119726   | 1.2204   | 1.2204 PF-00477736 up vs DMSO     |
| 18274  | 8037878 MEG3         | NM_020160       | 0.0269124   | 6.69292 | 6.69292 | 0.0269124   | 0.87817  | -1.30289 PF-00477736 down vs DMSO |
| 19653  | 8051372 MEMO1        | NM_015955       | 0.0218596   | 7.90564 | 7.90564 | 0.0218596   | 0.882172 | -1.3357 PF-00477736 down vs DMSO  |
| 21330  | 8068410 MEMO1        | NM_015955       | 0.0403903   | 7.89566 | 7.89566 | 0.0403903   | 0.899105 | -1.11222 PF-00477736 down vs DMSO |
| 24900  | 8103853 MGC45800     | NR_027107       | 0.0397349   | 5.22888 | 5.22888 | 0.0397349   | 1.14249  | 1.14249 PF-00477736 up vs DMSO    |
| 5256   | 7906978 MGST3        | NM_004528       | 0.0259147   | 9.61887 | 9.61887 | 0.0259147   | 0.655961 | -1.52448 PF-00477736 down vs DMSO |
| 21674  | 8071737 MIF          | NM_002415       | 0.0159243   | 10.7954 | 10.7954 | 0.0159243   | 0.68887  | -1.45165 PF-00477736 down vs DMSO |
| 11482  | 7969576 MIR17HG      | NR_027350       | 0           |         |         |             |          |                                   |

|         |                 |                 |            |         |         |            |          |                          |                          |
|---------|-----------------|-----------------|------------|---------|---------|------------|----------|--------------------------|--------------------------|
| 24950   | 8104298 NDUF56  | NM_004553       | 0.0148435  | 8.95223 | 8.95223 | 0.0148435  | 0.794616 | -1.25847                 | PF-00477736 down vs DMSO |
| 18400   | 8039068 NDUFV2  | NM_021074       | 0.0199335  | 9.82345 | 9.82345 | 0.0199335  | 0.791739 | -1.26304                 | PF-00477736 down vs DMSO |
| 16464   | 8020058 NDUFV2  | NM_021074       | 0.0202059  | 9.80199 | 9.80199 | 0.0202059  | 0.784289 | -1.27504                 | PF-00477736 down vs DMSO |
| 27155   | 8125125 NDU1A   | NM_0282531      | 0.0228251  | 9.57229 | 9.57229 | 0.0228251  | 1.39516  | -1.39516                 | PF-00477736 up vs DMSO   |
| 33052   | 8179851 NEU1    | NM_000434       | 0.0282531  | 7.57229 | 7.57229 | 0.0282531  | 1.39516  | -1.39516                 | PF-00477736 up vs DMSO   |
| 32929   | 8178676 NEU1    | NM_000434       | 0.0437996  | 7.93464 | 7.93464 | 0.0437996  | 1.37291  | -1.37291                 | PF-00477736 up vs DMSO   |
| 7515    | 7930074 NFKB2   | NM_002502       | 0.00626564 | 6.74776 | 6.74776 | 0.00626564 | 2.26153  | -2.26153                 | PF-00477736 up vs DMSO   |
| 22617   | 8081386 NFKB2   | NM_031419       | 0.0181783  | 5.68879 | 5.68879 | 0.0181783  | 2.09757  | -2.09757                 | PF-00477736 up vs DMSO   |
| 7437    | 7929243 NHP2    | NM_017838       | 0.0426055  | 9.4632  | 9.4632  | 0.0426055  | 0.745203 | -1.34192                 | PF-00477736 down vs DMSO |
| 7028    | 7925320 NID1    | NM_002508       | 0.00488302 | 4.20268 | 4.20268 | 0.00488302 | 1.18252  | -1.18252                 | PF-00477736 up vs DMSO   |
| 15366   | 8008517 NME1    | NM_198175       | 0.00491297 | 10.3588 | 10.3588 | 0.00491297 | 0.634141 | -1.57694                 | PF-00477736 down vs DMSO |
| 31088   | 8162252 NOLA    | NR_024020       | 0.0261281  | 9.46031 | 9.46031 | 0.0261281  | 0.831229 | -1.20304                 | PF-00477736 down vs DMSO |
| 26400   | 8137584 NOLA1   | NM_138400       | 0.0372481  | 8.43781 | 8.43781 | 0.0372481  | 0.781893 | -1.27895                 | PF-00477736 up vs DMSO   |
| 28149   | 8115907 NOR1B   | NM_016391       | 0.0496477  | 7.81944 | 7.81944 | 0.0496477  | 0.694525 | -1.49383                 | PF-00477736 down vs DMSO |
| 11219   | 7966779 NOS1    | NM_006020       | 0.00836457 | 4.60735 | 4.60735 | 0.00836457 | 1.18093  | -1.18093                 | PF-00477736 up vs DMSO   |
| 15323   | 8007976 NPEPP5  | NM_006310       | 0.0239849  | 9.72501 | 9.72501 | 0.0239849  | 0.800317 | -1.2495                  | PF-00477736 down vs DMSO |
| 17982   | 8035249 NR2F6   | NM_005234       | 0.0309747  | 7.74193 | 7.74193 | 0.0309747  | 0.812183 | -1.23125                 | PF-00477736 down vs DMSO |
| 30527   | 8156848 NRA43   | NM_006981       | 0.00125595 | 5.27121 | 5.27121 | 0.00125595 | 1.3768   | -1.3768                  | PF-00477736 up vs DMSO   |
| 32902   | 8178399 NRM     | NM_007243       | 0.0427639  | 8.94871 | 8.94871 | 0.0427639  | 0.649332 | -1.54004                 | PF-00477736 down vs DMSO |
| 33051   | 8179683 NRM     | NM_007243       | 0.0427639  | 8.94871 | 8.94871 | 0.0427639  | 0.649332 | -1.54004                 | PF-00477736 down vs DMSO |
| 27610   | 8081128 NSUN3   | NM_023072       | 0.0355264  | 7.75996 | 7.75996 | 0.0355264  | 1.19343  | -1.19343                 | PF-00477736 up vs DMSO   |
| 11149   | 7966026 NUAK1   | NM_014840       | 0.0162129  | 4.13576 | 4.13576 | 0.0162129  | 0.865339 | -1.15562                 | PF-00477736 down vs DMSO |
| 7689    | 7932069 NUDT5   | NM_014142       | 0.0348946  | 9.68629 | 9.68629 | 0.0348946  | 0.83481  | -1.19788                 | PF-00477736 down vs DMSO |
| 10305   | 7956949 NUP107  | NM_020401       | 0.0196789  | 8.74871 | 8.74871 | 0.0196789  | 0.713309 | -1.40192                 | PF-00477736 down vs DMSO |
| 9348    | 7947991 NUP160  | NM_015231       | 0.0432497  | 9.39374 | 9.39374 | 0.0432497  | 0.820625 | -1.21858                 | PF-00477736 down vs DMSO |
| 30678   | 8158446 NUP188  | NM_015354       | 0.00742775 | 9.89229 | 9.89229 | 0.00742775 | 0.713117 | -1.40219                 | PF-00477736 down vs DMSO |
| 28260   | 8136401 NUP205  | NM_015135       | 0.0190509  | 9.60294 | 9.60294 | 0.0190509  | 0.773639 | -1.29259                 | PF-00477736 down vs DMSO |
| 11134   | 7965855 NUP37   | NM_024057       | 0.0415187  | 8.74612 | 8.74612 | 0.0415187  | 0.669755 | -1.49308                 | PF-00477736 down vs DMSO |
| 27610   | 8130129 NUP43   | NM_013705       | 0.0337035  | 10.1115 | 10.1115 | 0.0337035  | 0.823366 | -1.17338                 | PF-00477736 down vs DMSO |
| 26772   | 8121704 NUS1    | NM_138459       | 0.0339039  | 10.6812 | 10.6812 | 0.0339039  | 0.815625 | -1.22605                 | PF-00477736 down vs DMSO |
| 14196   | 7996677 NUTF2   | NM_005796       | 0.0248642  | 11.1616 | 11.1616 | 0.0248642  | -1.78239 | PF-00477736 down vs DMSO |                          |
| 27733   | 8131349 OCM     | NM_001097622    | 0.0233235  | 5.13203 | 5.13203 | 0.0233235  | 1.10973  | -1.10973                 | PF-00477736 up vs DMSO   |
| 26986   | 8123843 OFC1    | AF520800        | 0.0452024  | 3.0745  | 3.0745  | 0.0452024  | 1.06812  | -1.06812                 | PF-00477736 up vs DMSO   |
| 7145    | 7926334 OLAH    | NM_018324       | 0.0270921  | 3.71411 | 3.71411 | 0.0270921  | 1.68853  | -1.68853                 | PF-00477736 up vs DMSO   |
| 7138    | 7926239 OPTN    | NM_001008211    | 0.014091   | 6.24495 | 6.24495 | 0.014091   | 1.45753  | -1.45753                 | PF-00477736 up vs DMSO   |
| 31152   | 8162936 OR13C2  | NM_001004481    | 0.0328886  | 3.01725 | 3.01725 | 0.0328886  | 1.18055  | -1.18055                 | PF-00477736 up vs DMSO   |
| 5656    | 7911271 OR14C2  | NM_00100448     | 0.0328886  | 4.71149 | 4.71149 | 0.0328886  | 0.823366 | -1.17338                 | PF-00477736 down vs DMSO |
| 27100   | 8124632 OR2B    | NM_00105226     | 0.0403527  | 3.65552 | 3.65552 | 0.0403527  | 1.16712  | -1.16712                 | PF-00477736 up vs DMSO   |
| 32887   | 8178285 OR2B3   | NM_001005226    | 0.0403527  | 3.65552 | 3.65552 | 0.0403527  | 1.16712  | -1.16712                 | PF-00477736 up vs DMSO   |
| 32022   | 8179589 OR2B3   | NM_001005226    | 0.0403527  | 3.65552 | 3.65552 | 0.0403527  | 1.16712  | -1.16712                 | PF-00477736 up vs DMSO   |
| 5635    | 7911207 OR2G2   | NM_001001915    | 0.0264105  | 4.49366 | 4.49366 | 0.0264105  | 0.885787 | -1.12894                 | PF-00477736 down vs DMSO |
| 8480    | 7939918 ORA415  | NM_001005275    | 0.0183847  | 3.29272 | 3.29272 | 0.0183847  | 1.16695  | -1.16695                 | PF-00477736 up vs DMSO   |
| 8548    | 7940177 ORA410  | NM_001004705    | 0.0355228  | 3.99394 | 3.99394 | 0.0355228  | 0.869194 | -1.15049                 | PF-00477736 down vs DMSO |
| 4213    | 7986740 ORA417  | NM_001005240    | 0.0356364  | 2.98762 | 2.98762 | 0.0356364  | 1.2266   | -1.2266                  | PF-00477736 up vs DMSO   |
| 13737   | 7991663 ORA417  | NM_001005240    | 0.0356364  | 2.98762 | 2.98762 | 0.0356364  | 1.2266   | -1.2266                  | PF-00477736 up vs DMSO   |
| 16880   | 8023937 ORA417  | NM_001005240    | 0.0356364  | 2.98762 | 2.98762 | 0.0356364  | 1.2266   | -1.2266                  | PF-00477736 up vs DMSO   |
| 9131    | 7945991 ORS1E2  | NM_030774       | 0.00149301 | 3.86368 | 3.86368 | 0.00149301 | 0.866384 | -1.15422                 | PF-00477736 down vs DMSO |
| 8275    | 7938008 ORS2D1  | NM_001005163    | 0.00962391 | 4.35866 | 4.35866 | 0.00962391 | 0.865002 | -1.15607                 | PF-00477736 down vs DMSO |
| 9134    | 7946001 ORS2R1  | NM_001005177    | 0.0154181  | 4.75823 | 4.75823 | 0.0154181  | 1.1174   | -1.1174                  | PF-00477736 up vs DMSO   |
| 10215   | 7955995 ORG6C5  | NM_001005518    | 0.0428967  | 3.59888 | 3.59888 | 0.0428967  | 1.1679   | -1.1679                  | PF-00477736 up vs DMSO   |
| 9843    | 7952373 ORX1    | NM_001005188    | 0.0416722  | 4.24522 | 4.24522 | 0.0416722  | 1.08972  | -1.08972                 | PF-00477736 up vs DMSO   |
| 17843   | 8033736 ORY1    | NM_001005192    | 0.0213331  | 4.07544 | 4.07544 | 0.0213331  | 0.889511 | -1.12421                 | PF-00477736 down vs DMSO |
| 17844   | 8033738 ORY2    | NM_001005192    | 0.0265527  | 3.93617 | 3.93617 | 0.0265527  | 1.11639  | -1.11639                 | PF-00477736 up vs DMSO   |
| 15483   | 8009705 OTOP2   | NM_178160       | 0.0386263  | 4.9796  | 4.9796  | 0.0386263  | 2.25115  | -4.25115                 | PF-00477736 up vs DMSO   |
| 8521    | 7940005 P2RK3   | NM_002559       | 0.00795897 | 4.53392 | 4.53392 | 0.00795897 | 1.15493  | -1.15493                 | PF-00477736 up vs DMSO   |
| 10236   | 7956152 PA2G4   | NM_006191       | 0.0378106  | 11.9524 | 11.9524 | 0.0378106  | 0.775398 | -1.28966                 | PF-00477736 down vs DMSO |
| 32261   | 8173168 PAGE3   | NR_033460       | 0.0407776  | 3.64875 | 3.64875 | 0.0407776  | 0.918494 | -1.08874                 | PF-00477736 down vs DMSO |
| 23955   | 8095221 PAIC3   | NM_001079525    | 0.00240582 | 10.0815 | 10.0815 | 0.00240582 | 0.637927 | -1.56758                 | PF-00477736 down vs DMSO |
| 22975   | 8084963 PAK2    | NM_002577       | 0.0461975  | 9.94981 | 9.94981 | 0.0461975  | 0.803421 | -1.24468                 | PF-00477736 down vs DMSO |
| 10962   | 7964089 PAN2    | NM_001127460    | 0.0438232  | 8.206   | 8.206   | 0.0438232  | 1.4144   | -1.4144                  | PF-00477736 up vs DMSO   |
| 13578   | 7990165 PARP6   | NM_0020214      | 0.0207316  | 9.00525 | 9.00525 | 0.0207316  | 1.24753  | -1.24753                 | PF-00477736 up vs DMSO   |
| 814047  | PAXIP1          | NM_001005240    | 0.0265527  | 3.93617 | 3.93617 | 0.0265527  | 0.823366 | -1.17338                 | PF-00477736 down vs DMSO |
| 21138   | 8066637 PCF1    | ENST00000372409 | 0.0481965  | 3.40066 | 3.40066 | 0.0481965  | 1.18058  | -1.18058                 | PF-00477736 up vs DMSO   |
| 20927   | 8064844 PCNA    | NM_002592       | 0.046601   | 10.2769 | 10.2769 | 0.046601   | 0.777797 | -1.28568                 | PF-00477736 down vs DMSO |
| 18671   | 8042519 PCYOX1  | NM_016297       | 0.00419744 | 8.03719 | 8.03719 | 0.00419744 | 0.775452 | -1.28957                 | PF-00477736 down vs DMSO |
| 24095   | 8096528 PDHA2   | NM_005390       | 0.0493354  | 5.04569 | 5.04569 | 0.0493354  | 0.846746 | -1.18099                 | PF-00477736 down vs DMSO |
| 19200   | 8046408 PDK1    | NM_002610       | 0.0129385  | 8.84821 | 8.84821 | 0.0129385  | 0.925218 | -1.68771                 | PF-00477736 down vs DMSO |
| 7188    | 7926807 PDS51   | NM_014317       | 0.0102212  | 9.49539 | 9.49539 | 0.0102212  | 0.711833 | -1.40482                 | PF-00477736 down vs DMSO |
| 22874   | 8150901 PENK    | NM_006211       | 0.0269655  | 5.49796 | 5.49796 | 0.0269655  | 1.44414  | -1.44414                 | PF-00477736 up vs DMSO   |
| 8004804 | PKA1            | NM_0181055      | 0.0365102  | 6.65162 | 6.65162 | 0.0365102  | 0.705239 | -1.41776                 | PF-00477736 down vs DMSO |
| 23160   | 8086961 PKFB4   | NM_004567       | 0.0020696  | 5.93476 | 5.93476 | 0.0020696  | 0.615014 | -1.62598                 | PF-00477736 down vs DMSO |
| 7474    | 7929624 PGAM1   | NM_002629       | 0.0142801  | 10.5106 | 10.5106 | 0.0142801  | 0.706634 | -1.41516                 | PF-00477736 down vs DMSO |
| 10146   | 7958152 PGAM1   | NM_002629       | 0.0150013  | 10.5714 | 10.5714 | 0.0150013  | 0.708793 | -1.41085                 | PF-00477736 down vs DMSO |
| 10496   | 7965480 PGAM1   | NM_002629       | 0.0150597  | 10.706  | 10.706  | 0.0150597  | 0.711905 | -1.40468                 | PF-00477736 down vs DMSO |
| 33229   | 8173729 PGAM4   | NM_001029891    | 0.0124812  | 10.1259 | 10.1259 | 0.0124812  | 0.733399 | -1.36351                 | PF-00477736 down vs DMSO |
| 32639   | 8176282 PGAM4   | NM_001029891    | 0.0124812  | 10.1259 | 10.1259 | 0.0124812  | 0.733399 | -1.36351                 | PF-00477736 down vs DMSO |
| 18994   | 8046400 PGM5    | NM_021965       | 0.043017   | 5.97031 | 5.97031 | 0.043017   | 1.16376  | -1.16376                 | PF-00477736 up vs DMSO   |
| 816151  | PKAC2           | NM_001005240    | 0.0265527  | 3.93617 | 3.93617 | 0.0265527  | 0.823366 | -1.17338                 | PF-00477736 up vs DMSO   |
| 30997   | 8161520 PGM5P2  | NR_028236       | 0.0261404  | 4.24737 | 4.24737 | 0.0261404  | 1.17549  | -1.17549                 | PF-00477736 up vs DMSO   |
| 24762   | 8102745 PGRMC2  | NM_006320       | 0.0105313  | 8.23136 | 8.23136 | 0.0105313  | 0.810769 | -1.2334                  | PF-00477736 down vs DMSO |
| 4271    | 7897322 PHF13   | NM_153812       | 0.00497425 | 6.99248 | 6.99248 | 0.00497425 | 0.839075 | -1.19179                 | PF-00477736 down vs DMSO |
| 15676   | 8012099 PHF23   | NM_024297       | 0.017153   | 7.19698 | 7.19698 | 0.017153   | 0.825201 | -1.21183                 | PF-00477736 down vs DMSO |
| 15182   | 8006634 PIGW    | NM_178517       | 0.00767303 | 8.30192 | 8.30192 | 0.00767303 | 0.581448 | -1.71984                 | PF-00477736 down vs DMSO |
| 22061   | 8075483 PIK3IP1 | NM_052880       | 0.029878   | 4.97091 | 4.97091 | 0.029878   | 1.31135  | -1.31135                 | PF-00477736 up vs DMSO   |
| 10562   | 7959856 PIWI1L  | NM_004764       | 0.0460715  | 4.0286  | 4.0286  | 0.0460715  | 0.902862 | -1.11079                 | PF-00477736 down vs DMSO |
| 22013   | 8075025 PIWI3   | NM_001008986    | 0.0232581  | 4.04228 | 4.04228 | 0.0232581  | 0.910292 | -1.09796                 | PF-00477736 down vs DMSO |
| 5399    | 7908672 PKP1    | NM_000299       | 0.0400659  | 4.96821 | 4.96821 | 0.0400659  | 0.921671 | -1.08499                 | PF-00477736 down vs DMSO |
| 18283   | 8037970 PLAGL2  | NM_003706       | 0.0323287  | 4.34553 | 4.34553 | 0.0323287  | 1.7354   | -1.7354                  | PF-00477736 up vs DMSO   |

|       |                     |              |             |         |         |             |          |                                    |
|-------|---------------------|--------------|-------------|---------|---------|-------------|----------|------------------------------------|
| 10593 | 7960261 RAD52       | NM_134424    | 0.0074012   | 7.39086 | 7.39086 | 0.0074012   | 1.21879  | 1.21879 PF-00477736 up vs DMSO     |
| 27841 | 8132406 RALA        | NM_005402    | 0.0361209   | 8.34796 | 8.34796 | 0.0361209   | 0.852899 | -1.17247 PF-00477736 down vs DMSO  |
| 26400 | 8117888 RAN         | NM_006325    | 0.0231902   | 10.984  | 10.984  | 0.0231902   | 0.793635 | -1.26002 PF-00477736 down vs DMSO  |
| 19565 | 7959504 RAS1        | NM_025045    | 0.025045    | 9.04483 | 9.04483 | 0.025045    | 0.891619 | -1.38188 PF-00477736 down vs DMSO  |
| 17963 | 8035050 RASL3       | NM_022904    | 0.0464664   | 7.14872 | 7.14872 | 0.0464664   | 1.51836  | -1.51836 PF-00477736 up vs DMSO    |
| 32099 | 8171516 RBBP7       | NM_002893    | 0.0170966   | 11.1998 | 11.1998 | 0.0170966   | 0.79447  | -1.2587 PF-00477736 down vs DMSO   |
| 16337 | 8018993 RBF3X       | NM_001082575 | 0.004147    | 5.44239 | 5.44239 | 0.004147    | 1.2066   | 1.2066 PF-00477736 up vs DMSO      |
| 8689  | 7941694 RBM14       | NM_006328    | 0.00836977  | 9.63274 | 9.63274 | 0.00836977  | 0.742639 | -1.34655 PF-00477736 down vs DMSO  |
| 21064 | 8066009 RBM39       | NM_184234    | 0.00809499  | 10.4487 | 10.4487 | 0.00809499  | 1.22125  | 1.22125 PF-00477736 up vs DMSO     |
| 22468 | 8079869 RBM5        | NM_005778    | 0.0357856   | 9.27959 | 9.27959 | 0.0357856   | 1.38305  | 1.38305 PF-00477736 up vs DMSO     |
| 4490  | 7899462 RCC1        | NM_001048194 | 0.039227    | 8.83095 | 8.83095 | 0.039227    | 0.783476 | -1.27636 PF-00477736 down vs DMSO  |
| 5472  | 7909502 RCDR3       | NM_001136223 | 0.0213371   | 8.58004 | 8.58004 | 0.0213371   | 1.34275  | 1.34275 PF-00477736 up vs DMSO     |
| 17426 | 8029580 RELB        | NM_006500    | 0.00170761  | 6.36471 | 6.36471 | 0.00170761  | 1.97129  | 1.97129 PF-00477736 up vs DMSO     |
| 23698 | 8092640 RFCA        | NM_002916    | 0.0132262   | 10.7451 | 10.7451 | 0.0132262   | 0.711383 | -1.40571 PF-00477736 down vs DMSO  |
| 30799 | 8159876 RFX3        | NM_134428    | 0.00843392  | 6.12159 | 6.12159 | 0.00843392  | 1.68131  | 1.68131 PF-00477736 up vs DMSO     |
| 6784  | 7922717 RGS16       | NM_002928    | 0.0178947   | 7.14094 | 7.14094 | 0.0178947   | 2.39957  | 2.39957 PF-00477736 up vs DMSO     |
| 5370  | 7908382 RGS21       | NM_001039152 | 0.0325786   | 3.50302 | 3.50302 | 0.0325786   | 1.13354  | 1.13354 PF-00477736 up vs DMSO     |
| 31639 | 8167774 RIBIC1      | NM_001031745 | 0.0138687   | 5.39747 | 5.39747 | 0.0138687   | 1.12775  | 1.12775 PF-00477736 up vs DMSO     |
| 32320 | 8173615 RILM        | NM_183353    | 0.0119287   | 8.125   | 8.125   | 0.0119287   | 1.14427  | 1.14427 PF-00477736 up vs DMSO     |
| 10848 | 7962864 RIN1        | NM_014470    | 0.00675423  | 5.35555 | 5.35555 | 0.00675423  | 2.09633  | 2.09633 PF-00477736 up vs DMSO     |
| 5971  | 7914603 RNF189      | NM_153341    | 0.0361971   | 7.29126 | 7.29126 | 0.0361971   | 1.33039  | 1.33039 PF-00477736 up vs DMSO     |
| 10517 | 7950282 RNF34       | NM_194271    | 0.0409589   | 8.58241 | 8.58241 | 0.0409589   | 0.844003 | -1.18357 PF-00477736 down vs DMSO  |
| 9067  | 7945420 RNF41       | NM_002939    | 0.0276793   | 7.73528 | 7.73528 | 0.0276793   | 0.824293 | -1.21316 PF-00477736 down vs DMSO  |
| 14396 | 7998774 RNP51       | NM_800594    | 0.0235362   | 10.6163 | 10.6163 | 0.0235362   | 0.859505 | -1.16346 PF-00477736 down vs DMSO  |
| 4495  | 7899502 RNU11       | NR_004407    | 0.0106338   | 7.99925 | 7.99925 | 0.0106338   | 2.28336  | 2.28336 PF-00477736 up vs DMSO     |
| 4369  | 7898375 RNU1-1      | NR_004430    | 0.0443288   | 11.4636 | 11.4636 | 0.0443288   | 1.36542  | 1.36542 PF-00477736 up vs DMSO     |
| 4373  | 7898411 RNU1-1      | NR_004430    | 0.0443288   | 11.4636 | 11.4636 | 0.0443288   | 1.36542  | 1.36542 PF-00477736 up vs DMSO     |
| 5819  | 7912800 RNU1-1      | NR_004430    | 0.0443288   | 11.4636 | 11.4636 | 0.0443288   | 1.36542  | 1.36542 PF-00477736 up vs DMSO     |
| 5825  | 7912850 RNU1-1      | NR_004430    | 0.0443288   | 11.4636 | 11.4636 | 0.0443288   | 1.36542  | 1.36542 PF-00477736 up vs DMSO     |
| 6460  | 7919576 RNU1-1      | NR_004430    | 0.0443288   | 11.4636 | 11.4636 | 0.0443288   | 1.36542  | 1.36542 PF-00477736 up vs DMSO     |
| 25726 | 8112176 RNU6ATAC    | NR_023344    | 0.0405705   | 5.50118 | 5.50118 | 0.0405705   | 1.5261   | 1.5261 PF-00477736 up vs DMSO      |
| 16437 | 8019804 ROCK1P1     | NR_033770    | 0.0118197   | 3.58635 | 3.58635 | 0.0118197   | 2.46798  | 2.46798 PF-00477736 up vs DMSO     |
| 31190 | 8163402 ROD1        | NM_005156    | 0.0294009   | 10.0008 | 10.0008 | 0.0294009   | 0.788182 | -1.26874 PF-00477736 down vs DMSO  |
| 14878 | 8003679 RPA1        | NM_002945    | 0.00953255  | 9.23145 | 9.23145 | 0.00953255  | 0.814679 | -1.22748 PF-00477736 down vs DMSO  |
| 18861 | 8043413 RPIA        | NM_144563    | 0.0400718   | 7.68843 | 7.68843 | 0.0400718   | 1.75544  | -1.32747 PF-00477736 down vs DMSO  |
| 7431  | 7929116 RPP30       | NM_006413    | 0.0123279   | 9.55868 | 9.55868 | 0.0123279   | 0.745564 | -1.34127 PF-00477736 down vs DMSO  |
| 20970 | 8123717 RRP10       | NM_003347    | 0.0460331   | 6.08116 | 6.08116 | 0.0460331   | 1.47036  | -1.47036 PF-00477736 down vs DMSO  |
| 8633  | 7941039 RPS6K4A     | NM_005982    | 0.0204696   | 9.09176 | 9.09176 | 0.0204696   | 0.806033 | -1.24064 PF-00477736 down vs DMSO  |
| 8245  | 7937915 RRM1        | NM_001033    | 0.0483809   | 10.383  | 10.383  | 0.0483809   | 0.742134 | -1.34746 PF-00477736 down vs DMSO  |
| 11260 | 7967304 RSRC2       | NR_036435    | 0.0196443   | 8.84636 | 8.84636 | 0.0196443   | 1.38628  | 1.38628 PF-00477736 up vs DMSO     |
| 17919 | 8034555 RTBDN       | NM_031429    | 0.0348364   | 4.70924 | 4.70924 | 0.0348364   | 1.14073  | 1.14073 PF-00477736 up vs DMSO     |
| 17482 | 8030113 RUVBL2      | NM_006666    | 0.0352939   | 9.01804 | 9.01804 | 0.0352939   | 0.798148 | -1.2529 PF-00477736 down vs DMSO   |
| 21861 | 8073645 SAMM50      | NM_015380    | 0.0454292   | 9.58757 | 9.58757 | 0.0454292   | 0.813819 | -1.28777 PF-00477736 down vs DMSO  |
| 4890  | 7903619 SAR5        | NM_006513    | 0.0266173   | 8.90923 | 8.90923 | 0.0266173   | 1.49081  | 1.49081 PF-00477736 up vs DMSO     |
| 17718 | 8032157 SERTAD1     | NM_014963    | 0.0344584   | 6.08116 | 6.08116 | 0.0344584   | 1.12176  | 1.12176 PF-00477736 up vs DMSO     |
| 24284 | 8098195 SCAMOL      | NM_006745    | 0.0152398   | 9.29294 | 9.29294 | 0.0152398   | 0.612913 | -1.35155 PF-00477736 down vs DMSO  |
| 24513 | 8100347 SCFD2       | NM_152540    | 0.0174127   | 8.52363 | 8.52363 | 0.0174127   | 0.754404 | -1.255404 PF-00477736 down vs DMSO |
| 18070 | 8036033 SCGBL8      | NM_001025591 | 0.0304153   | 5.35052 | 5.35052 | 0.0304153   | 1.25239  | 1.25239 PF-00477736 up vs DMSO     |
| 5611  | 7911017 SDCCA68     | NM_006642    | 0.0365417   | 6.93629 | 6.93629 | 0.0365417   | 1.32642  | 1.32642 PF-00477736 up vs DMSO     |
| 14488 | 8020254 SEH1L       | NM_031216    | 0.0316869   | 9.30556 | 9.30556 | 0.0316869   | 0.679603 | -1.47145 PF-00477736 down vs DMSO  |
| 26442 | 8099696 SEPS6CS     | NM_016955    | 0.0311124   | 7.69651 | 7.69651 | 0.0311124   | 1.24673  | 1.24673 PF-00477736 up vs DMSO     |
| 28131 | 8135069 SERPINE1    | NM_000602    | 0.000800523 | 5.03659 | 5.03659 | 0.000800523 | 1.53491  | 1.53491 PF-00477736 up vs DMSO     |
| 16164 | 8036902 SERTAD1     | NM_013736    | 0.0344584   | 6.08116 | 6.08116 | 0.0344584   | 1.36898  | 1.36898 PF-00477736 up vs DMSO     |
| 4487  | 7899436 SESN2       | NM_031459    | 0.00107603  | 6.74837 | 6.74837 | 0.00107603  | 2.22089  | 2.22089 PF-00477736 up vs DMSO     |
| 30671 | 8158372 SET         | NM_003011    | 0.00917361  | 11.8903 | 11.8903 | 0.00917361  | 0.861777 | -1.16039 PF-00477736 down vs DMSO  |
| 6264  | 7917674 SET         | NM_001122821 | 0.0409003   | 10.3081 | 10.3081 | 0.0409003   | 1.14847  | 1.14847 PF-00477736 down vs DMSO   |
| 5067  | 7905258 SETD8       | NM_001145415 | 0.0150712   | 8.21134 | 8.21134 | 0.0150712   | 1.21873  | 1.21873 PF-00477736 up vs DMSO     |
| 25526 | 8110090 SFXN1       | NM_022754    | 0.0326158   | 10.0725 | 10.0725 | 0.0326158   | 0.715073 | -1.39846 PF-00477736 down vs DMSO  |
| 7521  | 7930148 SFXN2       | NM_178858    | 0.00894188  | 8.4137  | 8.4137  | 0.00894188  | 0.710585 | -1.40729 PF-00477736 down vs DMSO  |
| 8126  | 7936641 SFXN4       | NM_213649    | 0.0384193   | 8.26493 | 8.26493 | 0.0384193   | 0.740222 | -1.35095 PF-00477736 down vs DMSO  |
| 5860  | 7913290 SH2D5       | NM_001103161 | 0.0358172   | 5.23201 | 5.23201 | 0.0358172   | 1.16669  | 1.16669 PF-00477736 up vs DMSO     |
| 25053 | 8109112 SH2D2       | NM_031915    | 0.0353112   | 7.28889 | 7.28889 | 0.0353112   | 0.655117 | -1.055117 PF-00477736 down vs DMSO |
| 24363 | 8089804 SLP         | NM_006527    | 0.0214633   | 9.68393 | 9.68393 | 0.0214633   | 0.795721 | -1.25672 PF-00477736 down vs DMSO  |
| 21578 | 8070912 SLC19A1     | NM_194255    | 0.0266231   | 8.68246 | 8.68246 | 0.0266231   | 0.738117 | -1.3548 PF-00477736 down vs DMSO   |
| 21931 | 8074388 SLC25A1     | NM_005984    | 0.0208712   | 9.3373  | 9.3373  | 0.0208712   | 0.700181 | -1.4282 PF-00477736 down vs DMSO   |
| 15559 | 8010673 SLC25A10    | NM_012140    | 0.017931    | 8.2514  | 8.2514  | 0.017931    | 0.639042 | -1.56484 PF-00477736 down vs DMSO  |
| 22142 | 8076260 SLC25A17    | NM_006358    | 0.00600811  | 8.26954 | 8.26954 | 0.00600811  | 0.741393 | -1.34881 PF-00477736 down vs DMSO  |
| 4285  | 7897460 SLC25A33    | NM_032315    | 0.0157022   | 8.21112 | 8.21112 | 0.0157022   | 0.780977 | -1.28045 PF-00477736 down vs DMSO  |
| 19666 | 7948885 SLC25A33    | NM_032315    | 0.0170567   | 8.00966 | 8.00966 | 0.0170567   | 0.747499 | -1.3378 PF-00477736 down vs DMSO   |
| 16082 | 8016018 SLC25A39    | NM_00143780  | 0.0322986   | 9.82191 | 9.82191 | 0.0322986   | 0.742917 | -1.40528 PF-00477736 down vs DMSO  |
| 12976 | 7983447 SLC28A2     | NM_004212    | 0.0200609   | 3.863   | 3.863   | 0.0200609   | 1.09895  | 1.09895 PF-00477736 up vs DMSO     |
| 31058 | 8162059 SLC28A3     | NM_022127    | 0.0159171   | 4.36776 | 4.36776 | 0.0159171   | 1.15508  | 1.15508 PF-00477736 up vs DMSO     |
| 6055  | 7915472 SLC2A1      | NM_006516    | 0.0123534   | 9.3711  | 9.3711  | 0.0123534   | 0.589354 | -1.69677 PF-00477736 down vs DMSO  |
| 14940 | 8004309 SLC2A4      | NM_001042    | 0.00649907  | 6.4051  | 6.4051  | 0.00649907  | 0.80062  | -1.24903 PF-00477736 down vs DMSO  |
| 25546 | 8110347 SLC34A1     | NM_003052    | 0.0246025   | 8.82437 | 8.82437 | 0.0246025   | 0.874295 | -1.14378 PF-00477736 down vs DMSO  |
| 16769 | 8022927 SLC39A6     | NM_012319    | 0.0278681   | 8.70483 | 8.70483 | 0.0278681   | 0.824985 | -1.21214 PF-00477736 down vs DMSO  |
| 10625 | 8051030 SLC5A6      | NM_021095    | 0.0191948   | 8.90824 | 8.90824 | 0.0191948   | 0.694121 | -1.44067 PF-00477736 down vs DMSO  |
| 18564 | 8165402 SNA5        | NM_0312991   | 0.0238287   | 9.23387 | 9.23387 | 0.0238287   | 0.739885 | -1.23137 PF-00477736 down vs DMSO  |
| 29786 | 8063382 SNA1        | NM_005985    | 0.031948    | 5.71296 | 5.71296 | 0.031948    | 1.63707  | 1.63707 PF-00477736 up vs DMSO     |
| 11665 | 7971386 SNORA31     | NR_002967    | 0.0368307   | 5.84855 | 5.84855 | 0.0368307   | 1.30354  | 1.30354 PF-00477736 up vs DMSO     |
| 9697  | 7951038 SNORA40     | NR_002973    | 0.0478641   | 8.34924 | 8.34924 | 0.0478641   | 0.744744 | -1.34274 PF-00477736 down vs DMSO  |
| 8319  | 7938293 SNORA45     | NR_002977    | 0.0200017   | 7.61702 | 7.61702 | 0.0200017   | 0.626855 | -1.59527 PF-00477736 down vs DMSO  |
| 15436 | 8009241 SNORD104    | NR_004380    | 0.0241525   | 9.81008 | 9.81008 | 0.0241525   | 1.32961  | 1.32961 PF-00477736 up vs DMSO     |
| 12828 | 7982068 SNORD115-31 | NR_003346    | 0.0174698   | 2.48929 | 2.48929 | 0.0174698   | 1.17832  | 1.17832 PF-00477736 up vs DMSO     |
| 15113 | 8005957 SNORD48     | NR_000009    | 0.0295539   | 8.11889 | 8.11889 | 0.0295539   | 0.692657 | -1.44372 PF-00477736 down vs DMSO  |
| 22135 | 8075219 SNORD93B    | NR_000328    | 0.0165291   | 7.12647 | 7.12647 | 0.0165291   | 0.799331 | -1.29983 PF-00477736 down vs DMSO  |
| 16202 | 8116532 SNORD95     | NR_002591    | 0.0410009   | 9.40027 | 9.40027 | 0.0410009   | 1.39996  | 1.39996 PF-00477736 up vs DMSO     |
| 13744 | 7901735 SNRNP25     | NM_024571    | 0.0312121   | 9.95229 | 9.95229 | 0.0312121   | 0.73127  | -1.36748 PF-00477736 down vs DMSO  |
| 17359 | 8028916 SNRPA       | NM_004596    | 0.0345541   | 10.6928 | 10.6928 | 0.0345541   | 0.814855 | -1.22721 PF-00477736 down vs DMSO  |
| 16504 | 8020411 SNRPD1      | NM_006938    | 0.0203439   | 8.81902 | 8.81902 | 0.0203439   | 0.762635 | -1.31124 PF-00477736 down vs DMSO  |
| 10379 | 7957649 SNRPF       | NM_003095    | 0.00530557  | 8.12714 | 8.12714 | 0.00530557  | 0.719798 | -1.38928 PF-00477736 down vs DMSO  |
| 29963 | 81515               |              |             |         |         |             |          |                                    |

|       |                   |                 |             |          |          |             |          |                                   |
|-------|-------------------|-----------------|-------------|----------|----------|-------------|----------|-----------------------------------|
| 15424 | 8009014 TLK2      | NM_006852       | 0.0346856   | 8.9425   | 8.9425   | 0.0346856   | 1.22928  | 1.22928 PF-00477736 up vs DMSO    |
| 20409 | 8059525 TM4SF20   | NM_024795       | 0.019063    | 3.04434  | 3.04434  | 0.019063    | 0.916535 | -1.09107 PF-00477736 down vs DMSO |
| 31386 | 8165642 TM4M203   | NM_053045       | 0.0116072   | 7.70746  | 7.70746  | 0.0116072   | 1.740472 | -1.35049 PF-00477736 down vs DMSO |
| 31372 | 8165486 TM4M203   | NM_053045       | 0.027989    | 8.08455  | 8.08455  | 0.027989    | 0.781748 | -1.27919 PF-00477736 down vs DMSO |
| 23709 | 8092735 TM4M207   | NM_207316       | 0.0181015   | 4.15392  | 4.15392  | 0.0181015   | 0.887043 | -1.12734 PF-00477736 down vs DMSO |
| 15101 | 8005839 TM4M597   | NM_014573       | 0.00581345  | 10.4777  | 10.4777  | 0.00581345  | 0.589701 | -1.69577 PF-00477736 down vs DMSO |
| 5741  | 7912145 TNF5F9    | NM_001561       | 0.0265882   | 4.68481  | 4.68481  | 0.0265882   | 1.98286  | 1.98286 PF-00477736 up vs DMSO    |
| 16985 | 8025053 TNF5F9    | NM_003811       | 0.000225687 | 6.68635  | 6.68635  | 0.000225687 | 1.53568  | 1.53568 PF-00477736 up vs DMSO    |
| 17419 | 8029521 TOMM40    | NM_001128917    | 0.00551855  | 8.52697  | 8.52697  | 0.00551855  | 0.750246 | -1.3329 PF-00477736 down vs DMSO  |
| 6774  | 7922648 TOR1AIP1  | NM_015602       | 0.00500568  | 5.79797  | 5.79797  | 0.00500568  | 1.25361  | 1.25361 PF-00477736 up vs DMSO    |
| 20662 | 8062034 TP53BP2   | NM_021202       | 0.0255741   | 6.84929  | 6.84929  | 0.0255741   | 1.19     | 1.19 PF-00477736 up vs DMSO       |
| 11879 | 7973142 TTPP1     | NM_173846       | 0.0461059   | 4.09127  | 4.09127  | 0.0461059   | 1.10027  | 1.10027 PF-00477736 up vs DMSO    |
| 14428 | 7990025 TRAP1     | NM_016292       | 0.0423382   | 9.98413  | 9.98413  | 0.0423382   | 0.712269 | -1.39418 PF-00477736 down vs DMSO |
| 12441 | 7978739 TRAPPCC6B | NM_001079537    | 0.00258983  | 7.88792  | 7.88792  | 0.00258983  | 1.37353  | 1.37353 PF-00477736 up vs DMSO    |
| 20494 | 8060344 TRIB3     | NM_021158       | 0.0395005   | 7.10263  | 7.10263  | 0.0395005   | 2.71894  | 2.71894 PF-00477736 up vs DMSO    |
| 24862 | 8103520 TRIM61    | NM_001012414    | 0.0244923   | 5.77253  | 5.77253  | 0.0244923   | 0.775594 | -1.28933 PF-00477736 down vs DMSO |
| 9201  | 7946380 TRIM66    | NM_014818       | 0.0169067   | 6.77268  | 6.77268  | 0.0169067   | 1.54915  | 1.54915 PF-00477736 up vs DMSO    |
| 24946 | 8104234 TRIP13    | NM_004237       | 0.0143901   | 9.05365  | 9.05365  | 0.0143901   | 0.614919 | -1.62623 PF-00477736 down vs DMSO |
| 31284 | 8164428 TRUB2     | NM_015679       | 0.0493443   | 8.7866   | 8.7866   | 0.0493443   | 0.807615 | -1.23821 PF-00477736 down vs DMSO |
| 32405 | 8174361 TSC2D3    | NM_198057       | 0.0427995   | 7.30521  | 7.30521  | 0.0427995   | 1.96846  | 1.96846 PF-00477736 up vs DMSO    |
| 17593 | 8031145 TSEN34    | NM_024075       | 0.0331743   | 6.93687  | 6.93687  | 0.0331743   | 0.892766 | -1.12011 PF-00477736 down vs DMSO |
| 13407 | 7987960 TTBK2     | NM_173500       | 0.0486521   | 7.3726   | 7.3726   | 0.0486521   | 1.19072  | 1.19072 PF-00477736 up vs DMSO    |
| 22184 | 8076569 TLL12     | NM_015140       | 0.0232666   | 9.22382  | 9.22382  | 0.0232666   | 0.682662 | -1.46485 PF-00477736 down vs DMSO |
| 10860 | 7963046 TUBA1B    | NM_006082       | 0.0395987   | 10.4724  | 10.4724  | 0.0395987   | 0.806483 | -1.23995 PF-00477736 down vs DMSO |
| 19084 | 8045291 TUBA3D    | NM_080386       | 0.0370549   | 6.18766  | 6.18766  | 0.0370549   | 0.89788  | -1.11374 PF-00477736 down vs DMSO |
| 26408 | 8117995 TUB8      | NM_178014       | 0.006915    | 12.9872  | 12.9872  | 0.006915    | 0.788404 | -1.26839 PF-00477736 down vs DMSO |
| 32843 | 8177858 TUB8      | NM_178014       | 0.006915    | 12.9872  | 12.9872  | 0.006915    | 0.788404 | -1.26839 PF-00477736 down vs DMSO |
| 32980 | 8179174 TUB8      | NM_178014       | 0.006915    | 12.9872  | 12.9872  | 0.006915    | 0.788404 | -1.26839 PF-00477736 down vs DMSO |
| 14565 | 8000603 TUFM4     | NM_003321       | 0.0258351   | 9.27054  | 9.27054  | 0.0258351   | 0.806947 | -1.23924 PF-00477736 down vs DMSO |
| 10817 | 7962441 TWF1      | NM_002822       | 0.0367654   | 8.55431  | 8.55431  | 0.0367654   | 0.821289 | -1.2176 PF-00477736 down vs DMSO  |
| 15854 | 8013906 TWF1      | NM_002822       | 0.0417796   | 8.47119  | 8.47119  | 0.0417796   | 0.796491 | -1.25551 PF-00477736 down vs DMSO |
| 4990  | 7904726 TXNP1     | NM_006472       | 0.0122023   | 9.7039   | 9.7039   | 0.0122023   | 1.78913  | 1.78913 PF-00477736 up vs DMSO    |
| 17866 | 8033996 TYK2      | NM_003331       | 0.0316304   | 7.94818  | 7.94818  | 0.0316304   | 1.16551  | 1.16551 PF-00477736 up vs DMSO    |
| 15638 | 8011626 UBE2G1    | NM_003342       | 0.00477585  | 10.9757  | 10.9757  | 0.00477585  | 0.811784 | -1.23186 PF-00477736 down vs DMSO |
| 11094 | 7965471 UBE2N     | NM_003348       | 0.00178989  | 8.98642  | 8.98642  | 0.00178989  | 0.804169 | -1.24352 PF-00477736 down vs DMSO |
| 31961 | 8170298 UBQLN2    | NM_001012989    | 0.000776593 | 7.03538  | 7.03538  | 0.000776593 | 0.776046 | -1.28858 PF-00477736 down vs DMSO |
| 18444 | 8033695 UBQLN2    | NM_001012989    | 0.0033695   | 9.06553  | 9.06553  | 0.0033695   | 1.35605  | -1.15605 PF-00477736 down vs DMSO |
| 32517 | 8176098 UBL4A     | NM_014235       | 0.0159312   | 7.53357  | 7.53357  | 0.0159312   | 0.759082 | -1.31738 PF-00477736 down vs DMSO |
| 9462  | 7948782 UBXN1     | NM_015853       | 0.0392155   | 8.40694  | 8.40694  | 0.0392155   | 1.11555  | 1.11555 PF-00477736 up vs DMSO    |
| 23161 | 8086981 UCN2      | NM_033199       | 0.0363388   | 5.67955  | 5.67955  | 0.0363388   | 0.854316 | -1.17053 PF-00477736 down vs DMSO |
| 15504 | 8009995 UNK       | NM_001080419    | 0.0105273   | 8.2134   | 8.2134   | 0.0105273   | 1.35908  | 1.35908 PF-00477736 up vs DMSO    |
| 21725 | 8072274 UQCRI10   | NM_001003684    | 0.0217666   | 9.10345  | 9.10345  | 0.0217666   | 0.809652 | -1.2351 PF-00477736 down vs DMSO  |
| 17729 | 8032284 UQCRI11   | NM_006830       | 0.0126678   | 8.43548  | 8.43548  | 0.0126678   | 0.828371 | -1.20719 PF-00477736 down vs DMSO |
| 5807  | 7912670 UQCRIH    | NM_006004       | 0.0101459   | 9.74475  | 9.74475  | 0.0101459   | 0.731456 | -1.36714 PF-00477736 down vs DMSO |
| 25318 | 8107998 UQLQA     | NM_014402       | 0.0331903   | 8.94923  | 8.94923  | 0.0331903   | 0.871848 | -1.14659 PF-00477736 down vs DMSO |
| 5557  | 7910416 UR82      | NM_014777       | 0.0150781   | 8.41235  | 8.41235  | 0.0150781   | 0.713605 | -1.40134 PF-00477736 down vs DMSO |
| 9956  | 7953483 USP5      | NM_001098536    | 0.0240134   | 8.48794  | 8.48794  | 0.0240134   | 0.836761 | -1.19508 PF-00477736 down vs DMSO |
| 25143 | 8106193 UTP15     | NM_032175       | 0.00734088  | 8.59591  | 8.59591  | 0.00734088  | 0.705832 | -1.16177 PF-00477736 down vs DMSO |
| 26412 | 8118028 VARS2     | NM_020442       | 0.0378054   | 7.22425  | 7.22425  | 0.0378054   | 0.857722 | -1.16588 PF-00477736 down vs DMSO |
| 32846 | 8177901 VARS2     | NM_020442       | 0.0451123   | 7.12574  | 7.12574  | 0.0451123   | 0.861245 | -1.16111 PF-00477736 down vs DMSO |
| 25961 | 8114145 VDAC1     | NM_003374       | 0.0335679   | 9.28812  | 9.28812  | 0.0335679   | 0.80545  | -1.24514 PF-00477736 down vs DMSO |
| 7364  | 7928524 VDAC2     | NM_001184783    | 0.00767413  | 7.03533  | 7.03533  | 0.00767413  | 0.765318 | -1.3222 PF-00477736 down vs DMSO  |
| 8624  | 7940904 VEGFB     | NM_003377       | 0.0164737   | 8.00708  | 8.00708  | 0.0164737   | 0.755523 | -1.32559 PF-00477736 down vs DMSO |
| 23595 | 8091678 VEPH1     | NM_024621       | 0.0194428   | 3.17472  | 3.17472  | 0.0194428   | 1.14796  | 1.14796 PF-00477736 up vs DMSO    |
| 27947 | 8133114 VKORC1L1  | NM_173517       | 0.00145061  | 9.1552   | 9.1552   | 0.00145061  | 0.753319 | -1.32746 PF-00477736 down vs DMSO |
| 32278 | 8173287 VSIG4     | NM_001184830    | 0.0427073   | 4.23419  | 4.23419  | 0.0427073   | 0.873061 | -1.1454 PF-00477736 down vs DMSO  |
| 17222 | 8027385 VSTM2B    | NM_001146339    | 0.0235439   | 7.35518  | 7.35518  | 0.0235439   | 1.1149   | 1.1149 PF-00477736 up vs DMSO     |
| 7194  | 7926851 WAC       | NR_024557       | 0.024604    | 10.6047  | 10.6047  | 0.024604    | 1.10205  | 1.10205 PF-00477736 up vs DMSO    |
| 12693 | 7981290 WARS      | NM_004184       | 0.0375458   | 8.87918  | 8.87918  | 0.0375458   | 1.50727  | 1.50727 PF-00477736 up vs DMSO    |
| 12230 | 7976766 WDR25     | NM_024515       | 0.0316261   | 6.30414  | 6.30414  | 0.0316261   | 1.09803  | 1.09803 PF-00477736 up vs DMSO    |
| 30736 | 8159111 WDR5      | NM_017588       | 0.0442008   | 8.94538  | 8.94538  | 0.0442008   | 0.799937 | -1.25017 PF-00477736 down vs DMSO |
| 13624 | 7990700 WDR61     | NM_025341       | 0.0469173   | 7.51163  | 7.51163  | 0.0469173   | 0.82908  | -1.21801 PF-00477736 down vs DMSO |
| 13674 | 7991126 WDR73     | NM_032856       | 0.0275526   | 7.26707  | 7.26707  | 0.0275526   | 1.17095  | 1.17095 PF-00477736 up vs DMSO    |
| 12643 | 7983306 WDR76     | NM_024908       | 0.039615    | 9.86182  | 9.86182  | 0.039615    | 0.754646 | -1.32512 PF-00477736 down vs DMSO |
| 13961 | 7918517 WDR77     | NM_024102       | 0.0211926   | 9.15391  | 9.15391  | 0.0211926   | 1.23189  | 1.23189 PF-00477736 up vs DMSO    |
| 29274 | 8145702 WRN       | NM_000553       | 0.0143655   | 8.75185  | 8.75185  | 0.0143655   | 0.751016 | -1.33153 PF-00477736 down vs DMSO |
| 6713  | 7922127 XCL2      | NM_003175       | 0.0497243   | 3.2088   | 3.2088   | 0.0497243   | 1.16236  | 1.16236 PF-00477736 up vs DMSO    |
| 27290 | 8126588 XPO5      | NM_027050       | 0.0492039   | 9.62736  | 9.62736  | 0.0492039   | 0.731272 | -1.36748 PF-00477736 down vs DMSO |
| 14555 | 8000462 XPO6      | NM_015171       | 0.0256284   | 10.6946  | 10.6946  | 0.0256284   | 0.806602 | -1.23977 PF-00477736 down vs DMSO |
| 13624 | 8144036 XRC2C     | NM_005421       | 0.0103717   | 9.55509  | 9.55509  | 0.0103717   | 0.650289 | -1.51449 PF-00477736 down vs DMSO |
| 19371 | 8048146 XRC5C     | NM_0012141      | 0.0101629   | 11.0138  | 11.0138  | 0.0101629   | 0.799322 | -1.25106 PF-00477736 down vs DMSO |
| 21840 | 8073457 XRC6C     | NM_0014669      | 0.0291745   | 10.7148  | 10.7148  | 0.0291745   | 0.807955 | -1.23769 PF-00477736 down vs DMSO |
| 4599  | 7900585 YBK1      | NM_004559       | 0.0182497   | 12.2413  | 12.2413  | 0.0182497   | 0.845423 | -1.18284 PF-00477736 down vs DMSO |
| 28892 | 8142084 YBK1P2    | CR601484        | 0.0392259   | 10.5086  | 10.5086  | 0.0392259   | 0.770886 | -1.29721 PF-00477736 down vs DMSO |
| 18643 | 8041281 YIPF4     | ENST00000238831 | 0.0322226   | 8.56014  | 8.56014  | 0.0322226   | 1.45225  | 1.45225 PF-00477736 up vs DMSO    |
| 20809 | 8055476 YWHAE     | NM_006761       | 0.0070947   | 12.0997  | 12.0997  | 0.0070947   | 0.762255 | -1.31319 PF-00477736 down vs DMSO |
| 15592 | 8011011 YWHAE     | NR_024598       | 0.0272184   | 12.1516  | 12.1516  | 0.0272184   | 0.796117 | -1.2561 PF-00477736 down vs DMSO  |
| 28737 | 8140398 YWHAQ     | NM_012479       | 0.0425801   | 9.53226  | 9.53226  | 0.0425801   | 0.851592 | -1.17372 PF-00477736 down vs DMSO |
| 29429 | 8147040 ZBTB10    | NM_001105539    | 0.0343572   | 7.51114  | 7.51114  | 0.0343572   | 1.47357  | 1.47357 PF-00477736 up vs DMSO    |
| 17769 | 8032755 ZBTB7A    | NM_015898       | 0.0151479   | 8.09526  | 8.09526  | 0.0151479   | 0.847166 | -1.18041 PF-00477736 down vs DMSO |
| 10238 | 7956162 ZC3H10    | NM_032786       | 0.00907154  | 5.81193  | 5.81193  | 0.00907154  | 1.21493  | 1.21493 PF-00477736 up vs DMSO    |
| 4556  | 7900146 ZC3H12A   | NM_025079       | 0.0282218   | 6.61252  | 6.61252  | 0.0282218   | 1.17097  | 1.17097 PF-00477736 up vs DMSO    |
| 14476 | 7999496 ZC3H7A    | NM_014153       | 0.0325517   | 8.72317  | 8.72317  | 0.0325517   | 1.31501  | 1.31501 PF-00477736 up vs DMSO    |
| 19399 | 8048478 ZFAND2B   | NM_138802       | 0.0208474   | 7.84207  | 7.84207  | 0.0208474   | 1.21134  | 1.21134 PF-00477736 up vs DMSO    |
| 17340 | 8028652 ZFP36     | NM_003407       | 0.0354811   | 7.12685  | 7.12685  | 0.0354811   | 1.37979  | 1.37979 PF-00477736 up vs DMSO    |
| 31382 | 8165622 ZNFND19   | NM_138462       | 0.0015588   | 18.15448 | 18.15448 | 0.0015588   | 0.742542 | -1.34673 PF-00477736 down vs DMSO |
| 13846 | 7992854 ZNF213    | NM_004220       | 0.0227034   | 6.07328  | 6.07328  | 0.0227034   | 1.08401  | 1.08401 PF-00477736 up vs DMSO    |
| 17408 | 8029399 ZNF226    | NM_001032372    | 0.0316301   | 5.91912  | 5.91912  | 0.0316301   | 1.48495  | 1.48495 PF-00477736 up vs DMSO    |
| 18393 | 8039013 ZNF231    | NM_203307       | 0.0329609   | 6.1849   | 6.1849   | 0.0329609   | 0.837659 | -1.1938 PF-00477736 down vs DMSO  |
| 28821 | 8141305 ZNF394    | NM_032164       | 0.0490942   | 8.27806  | 8.27806  | 0.0490942   | 1.24058  | 1.24058 PF-00477736 up vs DMSO    |
| 29060 | 8143702 ZNF425    | NM_001001661    | 0.0182976   | 5.60911  | 5.60911  | 0.0182976   | 1.35736  | 1.35736 PF-0047773                |
