# Supplementary material for: In vitro and in vivo single-agent efficacy of checkpoint kinase inhibition in acute lymphoblastic leukemia
Source: Springer Nature journal article supplement (doi:10.1186/s13045-015-0206-5), 2015-11-05
Supplement: MOESM4 [file 9777566]

Enrichment analysis report

Enrichment by Process Networks

| #  | Networks                                      | Total | pValue   | Min FDR  | p-value  | FDR      | In Data | Genes from Active Data                                                                                                                                                                                                                                             |
|----|-----------------------------------------------|-------|----------|----------|----------|----------|---------|--------------------------------------------------------------------------------------------------------------------------------------------------------------------------------------------------------------------------------------------------------------------|
| 1  | DNA damage_Checkpoint                         | 124   | 6.86E-10 | 1.1E-07  | 6.86E-10 | 1.1E-07  | 26      | RFC4, Ku70/80, PCNA, Ku80, 14-3-3 gamma, GADD45 alpha, Chk2, 14-3-3 epsilon, Ku70, Cyclin A, TLK2, GADD45 gamma, NF-kB, BTG2, CDK4, Cyclin A2, FANCD2, RUVBL2, ATF-3, MUS81, RAD1, Claspin, ANAPC5, c-Jun, CDK2, 14-3-3                                            |
| 2  | Cell cycle_S phase                            | 149   | 2.11E-09 | 1.69E-07 | 2.11E-09 | 1.69E-07 | 28      | RFC4, POLE3-POLE4 complex, PCNA, MCM6, GADD45 alpha, Chk2, MCM3, Cyclin A, ChAF1 subunit B, PTMA, TLK2, RPA1, MCM2, POLD reg (p50), FEN1, Histone H3, POLD cat (p125), MCM5, HSP90, Cyclin A2, POLE3 (YBL1), Rad51, WRN, HPI, Histone H4, Histone H1, CDK2, CDC45L |
| 3  | Apoptosis_Apoptotic nucleus                   | 159   | 3.97E-08 | 2.12E-06 | 3.97E-08 | 2.12E-06 | 27      | PHAP1 (pp32), Ku70/80, Ku80, Tip60, GADD45 alpha, Chk2, ING4, Ku70, NF-kB2 (p100), GADD45 gamma, Tau (MAPT), HDAC3, Tubulin alpha, PIG8, NF-kB, Histone H3, Cullin 2, NDPK A, FANCD2, Tyk2, Rad51, C/EBPbeta, IEX1, SET, Histone H2B, c-Jun, Histone H1            |
| 4  | DNA damage_DBS repair                         | 116   | 1.87E-06 | 6.34E-05 | 1.87E-06 | 6.34E-05 | 20      | Ku70/80, PCNA, Ku80, Tip60, Chk2, Ku70, PP2A regulatory, ChAF1 subunit B, XRCC2, E2N(UBC13), RPA1, Rad52, FEN1, Histone H3, FANCD2, RUVBL2, MUS81, Rad51, WRN, Histone H4                                                                                          |
| 5  | Transcription_Chromatin modification          | 128   | 2.38E-06 | 6.34E-05 | 2.38E-06 | 6.34E-05 | 21      | Tip60, HMG1/Y, HAT1, CARM1, PRMT1, Histone H3.3, EPC1, TLK2, HDAC3, SETDB1, Histone H3, RUVBL2, ING3, RBBP7 (RbAp46), Histone H2, HP1 gamma, Histone H2A, Histone H2B, Histone H4, Pc2, Histone H1                                                                 |
| 6  | Cell cycle_G1-S Interleukin regulation        | 128   | 2.38E-06 | 6.34E-05 | 2.38E-06 | 6.34E-05 | 21      | c-Jun/c-Fos, Cyclin A, JunD/c-Fos, AP-1, NF-kB2 (p100), NF-kB, RelB (NF-kB subunit), c-Fos, JunB, CDK4, Cyclin A2, NF-kB2 (p52), RalA, IL-8, p19, JAK3, Elk-1, c-Jun/c-Jun, NF-kB p52/RelB, c-Jun, CDK2                                                            |
| 7  | Inflammation_MIF signaling                    | 140   | 2.87E-06 | 6.55E-05 | 2.87E-06 | 6.55E-05 | 22      | PHAP1 (pp32), CREB1, HMG1/Y, MIF, c-Jun/c-Fos, Cyclin A, NF-kB2 (p100), CDK5, SKP2, NF-kB, c-Fos, PLC-beta, PLA2, CDK4, ICAM1, NF-kB2 (p52), PLC-beta3, IL-8, cPLA2, NF-kB p52/RelB, c-Jun, CDK2                                                                   |
| 8  | Cell cycle_G1-S Growth factor regulation      | 195   | 2.49E-05 | 0.000499 | 2.49E-05 | 0.000499 | 25      | c-Jun/c-Fos, PP2A regulatory, Cyclin A, JunD/c-Fos, AP-1, NF-kB2 (p100), NF-kB, RelB (NF-kB subunit), c-Fos, JunB, CDK4, NDPK A, Cyclin A2, NF-kB2 (p52), NDPK complex, RalA, PPP2R2B, p19, c-Jun/c-Jun, NDPK B, RBM5, NF-kB p52/RelB, Betacellulin, c-Jun, CDK2   |
| 9  | Cell cycle_G1-S                               | 163   | 3.47E-05 | 0.000617 | 3.47E-05 | 0.000617 | 22      | PCNA, 14-3-3 gamma, GADD45 alpha, Chk2, 14-3-3 epsilon, Cyclin A, Importin (karyopherin)-beta, Skp2/TrCP/FBXW, CDK5, SKP2, HDAC3, CDK4, Cyclin A2, FANCD2, Rad51, Claspin, p19, ANAPC5, SERTAD1, FosB, CDK2, 14-3-3                                                |
| 10 | Protein folding_Response to unfolded proteins | 69    | 4.64E-05 | 0.000742 | 4.64E-05 | 0.000742 | 13      | HSP90 alpha, HSP10 (mitochondrial), UBC7, HSC70, IRE1, ERO1, HSP60, HSP90, CHIP, HSP70, HSPA4, DNAJB2, HERP                                                                                                                                                        |
